# Supplementary material
Source: PubMed Central journal article supplement (PMC6822661)
Supplement: jama-322-409-s001.pdf [file jama-322-409-s001.pdf]

## Supplementary Online Content

Yang W-Y, Melgarejo JD, Thijs L, et al. Association of office and ambulatory blood pressure with mortality and cardiovascular end points. *JAMA*. doi:10.1001/jama.2019.9811

**Table 1.** Recruitment and Follow-Up by Cohort

**eTable 2.** Ambulatory Blood Pressure Monitoring by Cohort

**eTable 3.** Correlation Coefficients between BP Measurements

**eTable 4.** Incidence of End points

**eTable 5.** Association of Outcomes with DBP Indexes Without or With Adjustment for 24-Hour or Nighttime DBP

**eTable 6.** Association of Outcomes With 24-Hour and Nighttime DBP Adjusted for Other DBP Indexes

**eTable 7.** Association of Outcomes With SBP Indexes Without or With Adjustment for 24-Hour or Nighttime Among 8873 Untreated Participants

**eTable 8.** Association of Outcomes With 24-Hour or Nighttime SBP Adjusted for Other SBP Indexes Among 8873 Untreated Participants

**eTable 9.** Association of Outcomes With SBP Indexes During Wakefulness and Sleep in 7133 Participants Without or With Adjustment for 24-Hour Asleep SBP

**eTable 10.** Association of Outcomes With 24-Hour and Asleep SBP in 7133 Participants Adjusted for Other SBP Indexes

**eTable 11.** Sensitivity Analysis Excluding Cohorts

**eTable 12.** Improvement in Model Performance by Adding 24-Hour or Nighttime SBP to Another SBP Index

**eTable 13.** Improvement in Model Performance by Adding 24-Hour or Nighttime DBP to Another DBP Index

**eTable 14.** Improvement in Model Performance by Adding an SBP index to 24-Hour or Nighttime SBP

**eTable 15.** Improvement in Model Performance by Adding a DBP index to 24-Hour or Nighttime DBP

**eFigure 1.** Heat Map of 10-Year Risk in Relation to Nighttime vs 24-H DBP

**eFigure 2.** Cumulative Incidence of Cardiovascular Mortality, Coronary Outcomes and Stroke by Dipping Status

This supplementary material has been provided by the authors to give readers additional information about their work.

## Supplement 1

This Appendix formed part of the original submission and has been peer reviewed.

Supplement to: *Association of Office and Ambulatory Blood Pressure with Mortality and Cardiovascular Outcomes*. *JAMA*. 2019;322(5):1-12. doi:10.1001/jama.2019.9811.

### Table of Contents

|                                                                                                                                                                 |          |
|-----------------------------------------------------------------------------------------------------------------------------------------------------------------|----------|
| <b>Expanded Methods</b>                                                                                                                                         | Page e2  |
| <b>References</b>                                                                                                                                               | Page e5  |
| <b>eTable 1</b> Recruitment and Follow-Up by Cohort                                                                                                             | Page e7  |
| <b>eTable 2</b> Ambulatory Blood Pressure Monitoring by Cohort                                                                                                  | Page e8  |
| <b>eTable 3</b> Correlation Coefficients between BP Measurements                                                                                                | Page e9  |
| <b>eTable 4</b> Incidence of End Points                                                                                                                         | Page e10 |
| <b>eTable 5</b> Association of Outcomes With DBP Indexes Without or With Adjustment for 24-Hour or Nighttime DBP                                                | Page e11 |
| <b>eTable 6</b> Association of Outcomes With 24-Hour or Nighttime DBP Adjusted for Other DBP Indexes                                                            | Page e12 |
| <b>eTable 7</b> Association of Outcomes With SBP Indexes Without or With Adjustment for 24-Hour or Nighttime SBP Among 8873 Untreated Participants              | Page e13 |
| <b>eTable 8</b> Association of Outcomes With 24-Hour or Nighttime SBP Adjusted for Other SBP Indexes Among 8873 Untreated Participants                          | Page e14 |
| <b>eTable 9</b> Association of Outcomes With SBP Indexes During Wakefulness and Sleep in 7133 Participants Without or With Adjustment for 24-Hour or Asleep SBP | Page e15 |
| <b>eTable 10</b> Association of Outcomes with 24-Hour and Asleep SBP in 7133 Participants Adjusted for Other SBP Indexes                                        | Page e16 |
| <b>eTable 11</b> Sensitivity Analysis Excluding Cohorts                                                                                                         | Page e17 |
| <b>eTable 12</b> Improvement in Model Performance by Adding 24-Hour or Nighttime SBP to Another SBP Index                                                       | Page e18 |
| <b>eTable 13</b> Improvement in Model Performance by Adding 24 Hour or Nighttime DBP to Another DBP Index                                                       | Page e19 |
| <b>eTable 14</b> Improvement in Model Performance by Adding a SBP Index to 24-Hour or Nighttime SBP                                                             | Page e20 |
| <b>eTable 15</b> Improvement in Model Performance by Adding a DBP Index to 24-Hour or Nighttime DBP                                                             | Page e21 |
| <b>eFigure 1</b> Heat Map of 10-Year Risk in Relation to Nighttime vs. 24-Hour DBP                                                                              | Page e22 |
| <b>eFigure 2</b> Cumulative Incidence of Cardiovascular Mortality, Coronary Outcomes and Stroke by Dipping Status                                               | Page e23 |

## Expanded Methods

### Study Participants

All studies received ethical approval and adhered to the principles of the Declaration of Helsinki.<sup>1</sup> Participants gave written informed consent. Previous publications describe the IDACO database in detail.<sup>2</sup> Population studies qualified for inclusion, if information on the office and the ambulatory blood pressure and cardiovascular risk factors was available at baseline and if follow-up included both fatal and nonfatal outcomes. Of the 13,111 people included in the database, we excluded 1976 because they were teenagers without events ( $n = 493$ ), or had an ambulatory blood pressure recording with fewer than six daytime and three nighttime readings ( $n = 1483$ ).<sup>3</sup> Thus, the number of individuals statistically analyzed was 11,135. **eTable 1** provides detailed information on the population sampling methods, timelines and country of recruitment.

### Blood Pressure Measurement

**eTable 2** provides detailed information on blood pressure measurement. Nurses or physicians measured the conventional blood pressure with a standard mercury sphygmomanometers,<sup>4-11</sup> or with validated auscultatory<sup>12</sup> (USM-700F, UEDA Electronic Works, Tokyo, Japan) or oscillometric<sup>13,14</sup> devices (OMRON HEM-705CP, Omron Corporation, Kyoto, Japan; Dinamap 8100, Critikon Inc., Tampa, FL), using the appropriate cuff size, with participants in the sitting<sup>5-9,12-14</sup> or supine<sup>10</sup> position. Hypertension was a conventional blood pressure of  $\geq 140$  mm Hg systolic or  $\geq 90$  mm Hg diastolic or use of antihypertensive drugs.<sup>15</sup>

For ambulatory blood pressure monitoring, portable monitors were programmed to obtain ambulatory readings at 30-minute intervals throughout the whole day,<sup>4,12</sup> or at intervals of

15<sup>7-9,14</sup>, 20<sup>5,6,10,11,13</sup> or 30<sup>10</sup> minutes during daytime and at intervals of 20<sup>10</sup>, 30<sup>7-9,14</sup>, 40<sup>5,13</sup>, 45<sup>6,11</sup> or 60<sup>10</sup> minutes during nighttime. All devices had passed validation and only oscillometric measurements were used for analysis. The same SAS macro processed all ambulatory recordings, which remained unedited or were only sparsely edited in Ohasama participants.<sup>12</sup> We defined daytime as the interval from 10 AM to 8 PM in Europeans<sup>4,5,7-11</sup> and South Americans<sup>13,14</sup> and from 8 AM to 6 PM in Asians.<sup>6,12</sup> The corresponding nighttime intervals ranged from midnight to 6 AM<sup>5,7-9,13</sup> and from 10 PM to 4 AM,<sup>6,12</sup> respectively.

These short fixed clock-time intervals eliminate the transition periods in the morning and evening when blood pressure changes rapidly, resulting in daytime and nighttime blood pressure levels that are within 1–2 mm Hg of the awake and asleep levels.<sup>16</sup> We weighted the within-subject means of the ambulatory blood pressure by the time interval between successive readings. Furthermore, we also defined the awake and asleep periods of the day in 7133 participants (64.1%), who had kept a diary during ambulatory blood pressure monitoring. Automated office blood pressure was the mean of the ambulatory recordings during the first recording hour, when the monitors were applied in a medical environment.

The dipping ratio was the nighttime divided by the daytime blood pressure level. We focused on systolic blood pressure, because mean age was 53.4 years and in older adults systolic blood pressure is the predominant risk factor.<sup>17</sup> Diastolic pressure was analyzed to replicate findings for systolic pressure. Dipping ratio was defined as nighttime divided by daytime BP. In categorical analyses, extreme dipping, normal dipping, non-dipping and reverse dipping were dipping ratios of  $\leq 0.80$ ,  $>0.80$  to  $\leq 0.90$ ,  $>0.90$  to  $\leq 1.00$ , and  $>1.00$ , respectively.<sup>18</sup>

## Other Measurements

We used the questionnaires originally administered in each cohort to obtain information on each participant's medical history and smoking and drinking habits.<sup>4-14</sup> Body mass index was body weight in kilograms divided by height in meters squared. We measured serum total cholesterol and blood glucose by automated enzymatic methods. Diabetes mellitus was the use of antidiabetic drugs, a fasting blood glucose of  $\geq 126$  mg/dL ( $\geq 7.0$  mmol/L),<sup>5-13</sup> a random blood glucose of  $\geq 200$  mg/dL ( $\geq 11.1$  mmol/L),<sup>5,6,12</sup> a self-reported diagnosis,<sup>5,11-13</sup> or diabetes documented in practice or hospital records.<sup>13</sup>

## References

1. World Medical Association. World Medical Association Declaration of Helsinki: ethical principles for medical research involving human subjects. *JAMA*. 2013;310(20):2191-2194.
2. Thijs L, Hansen TW, Kikuya M, et al. The International Database of Ambulatory blood pressure in relation to Cardiovascular Outcome (IDACO): protocol and research perspectives. *Blood Press Monit*. 2007;12(4):255-262.
3. Yang WY, Thijs L, Zhang ZY, et al. Evidence-based proposal for the number of ambulatory readings required for assessing blood pressure level in research settings: An analysis of the IDACO database. *Blood Press*. 2018;27(6):341-350.
4. O'Brien E, Murphy J, Tyndall A, et al. Twenty-four-hour ambulatory blood pressure in men and women aged 17 to 80 years: the Allied Irish Bank Study. *J Hypertens*. 1991;9(4):355-360.

5. Staessen JA, Bieniaszewski L, O'Brien ET, Imai Y, Fagard R. An epidemiological approach to ambulatory blood pressure monitoring: the Belgian population study. *Blood Press Monit.* 1996;1(1):13-26.
6. Li Y, Wang JG, Gao HF, et al. Are published characteristics of the ambulatory blood pressure generalizable to rural Chinese? The JingNing population study. *Blood Press Monit.* 2005;10(3):125-134.
7. Kuznetsova T, Staessen JA, Kawecka-Jaszcz K, et al. Quality control of the blood pressure phenotype in the European Project on Genes in Hypertension. *Blood Press Monit.* 2002;7(4):215-224.
8. Hansen TW, Jeppesen J, Rasmussen S, Ibsen H, Torp-Pedersen C. Ambulatory blood pressure monitoring and risk of cardiovascular disease: a population based study. *Am J Hypertens.* 2006;19(3):243-250.
9. Kuznetsova T, Malyutina S, Pello E, Thijs L, Nikitin Y, Staessen JA. Ambulatory blood pressure of adults in Novosibirsk, Russia: interim report on a population study. *Blood Press Monit.* 2000;5(5-6):291-296.
10. Ingelsson E, Björklund K, Lind L, Ärnlöv J, Sundström J. Diurnal blood pressure pattern and risk of congestive heart failure. *JAMA.* 2006;295(24):2859-2866.
11. Tikhonoff V, Kuznetsova T, Thijs L, et al. Ambulatory blood pressure and long-term risk for atrial fibrillation. *Heart.* 2018;104(15):1263-1270.

12. Ohkubo T, Hozawa A, Yamaguchi J, et al. Prognostic significance of the nocturnal decline in blood pressure in individuals with and without high 24-h blood pressure: the Ohasama study. *J Hypertens*. 2002;20(11):2183-2189.
13. Schettini C, Bianchi M, Nieto F, Sandoya E, Senra H, Hypertension Working Group. Ambulatory blood pressure. Normality and comparison with other measurements. *Hypertension*. 1999;34(4 Pt 2):818-825.
14. Maestre GE, Pino-Ramírez G, Molero AE, et al. The Maracaibo Aging Study: population and methodological issues. *Neuroepidemiology*. 2002;21(4):194-201.
15. Mancia G, Fagard R, Narkiewicz K, et al. 2013 ESH/ESC Guidelines for the management of arterial hypertension: The Task Force for the management of arterial hypertension of the European Society of Hypertension (ESH) and of the European Society of Cardiology (ESC) *Eur Heart J*. 2013;34(28):2159-2219.
16. Fagard R, Brguljan J, Thijs L, Staessen J. Prediction of the actual awake and asleep blood pressures by various methods of 24 h pressure analysis. *J Hypertens*. 1996;14(5):557-563.
17. Franklin SS, Larson MG, Khan SA, et al. Does the relation of blood pressure to coronary heart disease change with aging? The Framingham Heart Study. *Circulation*. 2001;103(9):1245-1249.
18. O'Brien E, Parati G, Stergiou G, et al. European Society of Hypertension position paper on ambulatory blood pressure monitoring. *J Hypertens*. 2013;31(9):1731-1767.

**eTable 1. Recruitment and Follow-Up by Cohort**

| Catchment Area                              | Sampling Frame                                                         | Recruitment      |                                            | PR (%) | N° of Participants |          | Follow-Up   |                                  |
|---------------------------------------------|------------------------------------------------------------------------|------------------|--------------------------------------------|--------|--------------------|----------|-------------|----------------------------------|
|                                             |                                                                        | Timeline (Years) | Invitation                                 |        | In Database        | Analyzed | Last (Year) | Median in Years (5–95% Interval) |
| Ohasama, Iwate, Japan                       | People aged ≥40 years                                                  | 1988–1994        | Address list                               | 78     | 1535               | 1535     | 2015        | 21.8 (4.7–26.8)                  |
| JingNing, Zhejiang, China                   | Family-based random sample                                             | 2003–2003        | All villagers invited                      | 62     | 360                | 352      | 2006        | 2.5 (2.3–2.6)                    |
| Oktyabrsky, Novosibirsk, Russian Federation | Family-based random sample                                             | 1999–2001        | Address list                               | 68     | 298                | 283      | 2009        | 8.8 (8.0–9.5)                    |
| Niepolomice, Kraków, Poland                 | Family-based random sample                                             | 1999–2008        | Address list                               | 54     | 413                | 355      | 2014        | 13.5 (6.1–14.3)                  |
| Gdańsk, Poland                              | Family-based random sample                                             | 2008–2010        | Address list                               | 90     | 215                | 202      | 2014        | 5.6 (4.7–6.7)                    |
| Pilsen, Czech Republic                      | Family-based random sample                                             | 2000–2001        | Address list                               | 82     | 174                | 159      | 2015        | 14.1 (13.8–14.4)                 |
| Padova, Italy                               | Family-based random sample                                             | 1999–2007        | Address list                               | 73     | 314                | 305      | 2013        | 13.3 (12.5–14.5)                 |
| Noordkempen, Belgium                        | Family-based random sample                                             | 1985–2008        | Address list                               | 78     | 2904               | 1430     | 12016       | 22.8 (7.9–26.2)                  |
| Uppsala, Sweden                             | Men aged 69–74 years                                                   | 1991–1995        | Population census                          | 73     | 1143               | 1114     | 2015        | 15.1 (3.5–22.2)                  |
| Copenhagen County, Denmark                  | Stratified random sample of women and men aged 30, 40, 50 and 60 years | 1993–1997        | Population registry                        | 83     | 2311               | 2148     | 2010        | 16.3 (5.1–17.3)                  |
| Dublin, Ireland                             | Bank employees working at branches across Ireland                      | 1989–1991        | All invited                                | 14     | 981                | 933      | 2007        | 17.6 (16.4–18.2)                 |
| Maracaibo, Venezuela                        | City residents aged ≥55 years                                          | 1998–2008        | Population census                          | 71     | 604                | 590      | 2012        | 8.2 (1.7–13.7)                   |
| Montevideo, Uruguay                         | Age-stratified random sample                                           | 1995–1998        | Members of a health insurance organization | 78     | 1859               | 1729     | 2007        | 9.0 (4.2–10.7)                   |

Abbreviation: PR, participation rate. The European Project on Genes in Hypertension included participants recruited in Novosibirsk, Kraków, Gdańsk, Pilsen and Padova. Participants from Padova were recruited in Mirano in the province of Venice and in Torrelvelicino and Valli del Pasubio in the province of Vicenza.



**eTable 2. Ambulatory Blood Pressure Monitoring by Cohort**

| Study Cohorts                   | N° of People | Monitoring Device          | Programmed Reading Intervals minutes |       | N° of Readings |        |    |     |     |     |
|---------------------------------|--------------|----------------------------|--------------------------------------|-------|----------------|--------|----|-----|-----|-----|
|                                 |              |                            | Day                                  | Night | Programmed     | Median | P5 | P25 | P75 | P95 |
| Ohasama, Iwate, Japan           | 1535         | ABP-630, Nippon Colin      | 30                                   | 30    | 48             | 45     | 35 | 42  | 48  | 50  |
| JingNing, Zhejiang, China       | 352          | 90207, SpaceLabs           | 20                                   | 45    | 65             | 56     | 52 | 55  | 56  | 57  |
| Oktyabrsky, Novosibirsk, Russia | 283          | 90202, SpaceLabs           | 15                                   | 30    | 76             | 71     | 56 | 65  | 75  | 78  |
| Niepolomice, Kraków, Poland     | 355          | 90202, SpaceLabs           | 15                                   | 30    | 76             | 74     | 54 | 61  | 77  | 79  |
| Gdańsk, Poland                  | 202          | TM-2430, A&D               | 20                                   | 45    | 65             | 62     | 50 | 59  | 64  | 64  |
| Pilsen, Czech Republic          | 159          | 90202, SpaceLabs           | 20                                   | 45    | 65             | 75     | 54 | 70  | 80  | 82  |
| Padova, Italy                   | 305          | 90202, SpaceLabs           | 15                                   | 30    | 76             | 76     | 66 | 74  | 77  | 78  |
| Noordkempen, Belgium            | 1430         | 90202, SpaceLabs           | 20                                   | 40    | 55             | 53     | 37 | 41  | 56  | 58  |
| Uppsala, Sweden                 | 1114         | Accutrack II               | 20–30                                | 20–60 | 41–72          | 65     | 44 | 52  | 75  | 84  |
| Copenhagen County, Denmark      | 2148         | TM-2421, A&D               | 15                                   | 30    | 80             | 80     | 67 | 78  | 81  | 83  |
| Dublin, Ireland                 | 933          | 90202 and 90207, Spacelabs | 30                                   | 30    | 48             | 46     | 37 | 44  | 48  | 49  |
| Maracaibo, Venezuela            | 590          | 90207, SpaceLabs           | 15                                   | 30    | 80             | 67     | 51 | 61  | 71  | 77  |
| Montevideo, Uruguay             | 1729         | 90207, SpaceLabs           | 20                                   | 40    | 60             | 37     | 26 | 33  | 39  | 42  |

The TM-2421 and TM-2430 monitors implemented both an auscultatory and an oscillometric technique. However, only oscillometric readings were used for analysis. All devices passed validation.

**eTable 3. Correlation Coefficients between Blood Pressure Measurements**

|                        | Conventional<br>BP | Automated<br>Office BP | 24-Hour BP | Daytime BP | Nighttime BP |
|------------------------|--------------------|------------------------|------------|------------|--------------|
| <b>Systolic</b>        |                    |                        |            |            |              |
| Conventional office BP | —                  |                        |            |            |              |
| Automated office BP    | 0.71               | —                      |            |            |              |
| 24-hour BP             | 0.67               | 0.78                   | —          |            |              |
| Daytime BP             | 0.62               | 0.80                   | 0.94       | —          |              |
| Nighttime BP           | 0.60               | 0.62                   | 0.89       | 0.72       | —            |
| Dipping ratio          | 0.09               | -0.08                  | 0.11       | -0.20      | 0.54         |
| <b>Diastolic</b>       |                    |                        |            |            |              |
| Conventional office BP | —                  |                        |            |            |              |
| Automated office BP    | 0.62               | —                      |            |            |              |
| 24-hour BP             | 0.62               | 0.74                   | —          |            |              |
| Daytime BP             | 0.59               | 0.74                   | 0.93       | —          |              |
| Nighttime BP           | 0.53               | 0.56                   | 0.85       | 0.64       | —            |
| Dipping ratio          | 0.06               | -0.056                 | 0.11       | -0.22      | 0.59         |

Abbreviation: BP, blood pressure. Daytime and nighttime were defined using short fixed clock-time intervals (see Expanded Methods and reference 16). Dipping ratio is nighttime divided by daytime BP. All correlation coefficients were significant ( $P < .001$ ).

**eTable 4. Incidence of End Points**

| End Point                    | Number of End Points |       |          |
|------------------------------|----------------------|-------|----------|
|                              | End Point            | Fatal | Nonfatal |
| Total mortality              | 2836                 | 2836  |          |
| Cardiovascular mortality     | 1073                 | 1073  |          |
| Non-cardiovascular mortality |                      | 1611  |          |
| Death from renal failure     |                      | 45    |          |
| Cause of death unknown       |                      | 107   |          |
| All cardiovascular Outcomes  | 2049                 |       |          |
| Coronary Outcomes            | 922                  |       |          |
| Myocardial infarction        |                      | 234   | 441      |
| Coronary revascularization   |                      |       | 180      |
| Other ischemic heart disease |                      | 154   |          |
| Sudden death                 |                      | 83    |          |
| Heart failure                |                      | 154   | 594      |
| Stroke                       | 822                  | 283   | 684      |

Median follow-up of 11,135 participants was 13.8 years (5th to 95th percentile interval, 2.5–25.1 years). The nonfatal events do not add up, because within each category only the first event was analyzed.

**eTable 5. Association of Outcomes With DBP Indexes Without or With Adjustment for 24-Hour or Nighttime DBP**

| Outcomes<br>DBP Indexes            | Adjusted <sup>a</sup> |       | Additionally adjusted<br>for 24-Hour DBP <sup>b</sup> |       | Additionally Adjusted<br>for Nighttime DBP <sup>b</sup> |      |
|------------------------------------|-----------------------|-------|-------------------------------------------------------|-------|---------------------------------------------------------|------|
|                                    | HR (CI) <sup>c</sup>  | P     | HR (CI) <sup>c</sup>                                  | P     | HR (CI) <sup>c</sup>                                    | P    |
| <b>Total Mortality (n = 2836)</b>  |                       |       |                                                       |       |                                                         |      |
| Conventional DBP                   | 1.07 (1.03 to 1.11)   | <.001 | 1.02 (0.98 to 1.07)                                   | .31   | 1.02 (0.98 to 1.06)                                     | .40  |
| Automated office DBP               | 1.04 (1.01 to 1.07)   | .02   | 0.97 (0.93 to 1.01)                                   | .11   | 0.99 (0.95 to 1.02)                                     | .48  |
| 24-hour DBP                        | 1.14 (1.09 to 1.19)   | <.001 | NA                                                    | NA    | 0.98 (0.90 to 1.06)                                     | .61  |
| Daytime DBP                        | 1.09 (1.04 to 1.13)   | <.001 | 0.86 (0.78 to 0.96)                                   | .007  | 0.99 (0.94 to 1.05)                                     | .77  |
| Nighttime DBP                      | 1.16 (1.11 to 1.21)   | <.001 | 1.18 (1.09 to 1.27)                                   | <.001 | NA                                                      | NA   |
| Dipping ratio <sup>d</sup>         | 1.09 (1.05 to 1.14)   | <.001 | 1.09 (1.04 to 1.13)                                   | <.001 | 1.01 (0.97 to 1.06)                                     | .56  |
| <b>All CV Outcomes (n = 2049)</b>  |                       |       |                                                       |       |                                                         |      |
| Conventional DBP                   | 1.14 (1.10 to 1.19)   | <.001 | 1.03 (0.99 to 1.09)                                   | .17   | 1.06 (1.01 to 1.11)                                     | .02  |
| Automated office DBP               | 1.10 (1.06 to 1.14)   | <.001 | 0.96 (0.91 to 1.01)                                   | .10   | 1.02 (0.98 to 1.06)                                     | .31  |
| 24-hour DBP                        | 1.30 (1.24 to 1.37)   | <.001 | NA                                                    | NA    | 1.16 (1.05 to 1.28)                                     | .003 |
| Daytime DBP                        | 1.21 (1.15 to 1.27)   | <.001 | 0.83 (0.73 to 0.93)                                   | .002  | 1.07 (1.01 to 1.14)                                     | .02  |
| Nighttime BP                       | 1.26 (1.20 to 1.32)   | <.001 | 1.13 (1.04 to 1.23)                                   | .005  | NA                                                      | NA   |
| Dipping ratio <sup>d</sup>         | 1.10 (1.05 to 1.15)   | <.001 | 1.08 (1.04 to 1.13)                                   | <.001 | 0.95 (0.90 to 1.01)                                     | .07  |
| <b>CV Mortality (n = 1073)</b>     |                       |       |                                                       |       |                                                         |      |
| Conventional DBP                   | 1.13 (1.07 to 1.20)   | <.001 | 1.03 (0.96 to 1.10)                                   | .38   | 1.04 (0.98 to 1.11)                                     | .21  |
| Automated office DBP               | 1.07 (1.02 to 1.13)   | .007  | 0.92 (0.86 to 0.99)                                   | .02   | 0.98 (0.93 to 1.04)                                     | .56  |
| 24-hour DBP                        | 1.29 (1.20 to 1.39)   | <.001 | NA                                                    | NA    | 1.09 (0.95 to 1.24)                                     | .22  |
| Daytime DBP                        | 1.19 (1.12 to 1.28)   | <.001 | 0.80 (0.67 to 0.94)                                   | .007  | 1.04 (0.96 to 1.13)                                     | .35  |
| Nighttime DBP                      | 1.28 (1.20 to 1.36)   | <.001 | 1.20 (1.07 to 1.35)                                   | .002  | NA                                                      | NA   |
| Dipping ratio <sup>d</sup>         | 1.13 (1.06 to 1.20)   | <.001 | 1.11 (1.04 to 1.18)                                   | <.001 | 0.98 (0.90 to 1.05)                                     | .53  |
| <b>Coronary Outcomes (n = 922)</b> |                       |       |                                                       |       |                                                         |      |
| Conventional DBP                   | 1.08 (1.02 to 1.15)   | .008  | 1.02 (0.95 to 1.09)                                   | .66   | 1.02 (0.95 to 1.09)                                     | .60  |
| Automated office DBP               | 1.07 (1.01 to 1.13)   | .02   | 0.98 (0.91 to 1.06)                                   | .66   | 1.01 (0.95 to 1.07)                                     | .79  |
| 24-hour DBP                        | 1.18 (1.09 to 1.27)   | <.001 | NA                                                    | NA    | 1.02 (0.88 to 1.17)                                     | .82  |
| Daytime DBP                        | 1.11 (1.04 to 1.20)   | .003  | 0.84 (0.70 to 1.01)                                   | .06   | 1.01 (0.92 to 1.10)                                     | .91  |
| Nighttime DBP                      | 1.18 (1.10 to 1.26)   | <.001 | 1.16 (1.03 to 1.32)                                   | .02   | NA                                                      | NA   |
| Dipping ratio <sup>d</sup>         | 1.11 (1.03 to 1.18)   | .003  | 1.09 (1.02 to 1.17)                                   | .009  | 1.01 (0.93 to 1.10)                                     | .81  |
| <b>Stroke (n = 822)</b>            |                       |       |                                                       |       |                                                         |      |
| Conventional DBP                   | 1.19 (1.12 to 1.27)   | <.001 | 1.06 (0.98 to 1.14)                                   | .15   | 1.09 (1.01 to 1.17)                                     | .02  |
| Automated office DBP               | 1.15 (1.08 to 1.22)   | <.001 | 0.98 (0.90 to 1.06)                                   | .58   | 1.05 (0.99 to 1.13)                                     | .11  |
| 24-hour DBP                        | 1.41 (1.29 to 1.53)   | <.001 | NA                                                    | NA    | 1.24 (1.06 to 1.44)                                     | .006 |
| Daytime DBP                        | 1.29 (1.19 to 1.39)   | <.001 | 0.84 (0.70 to 1.02)                                   | .08   | 1.12 (1.02 to 1.24)                                     | .02  |
| Nighttime DBP                      | 1.34 (1.24 to 1.44)   | <.001 | 1.15 (1.00 to 1.31)                                   | .05   | NA                                                      | NA   |
| Dipping ratio <sup>d</sup>         | 1.10 (1.02 to 1.18)   | .013  | 1.07 (1.00 to 1.15)                                   | .05   | 0.89 (0.82 to 0.98)                                     | .01  |

Abbreviations: CI, 95% confidence interval; CV, cardiovascular; DBP, diastolic blood pressure; HR, hazard ratio; NA, not applicable.

<sup>a</sup> All models accounted for cohort, sex, age, body mass index, smoking and drinking, serum cholesterol, antihypertensive drug intake, history of cardiovascular disease and diabetes mellitus.

<sup>b</sup> Models including two correlated DBP indexes were constructed, using the residual method (see Statistical Analysis).

<sup>c</sup> Hazard ratios express the risk for increments of 10 mm Hg in DBP and 0.10 in the dipping ratio.

<sup>d</sup> The dipping ratio is calculated by dividing nighttime by daytime DBP.

**eTable 6. Association of Outcomes With 24-Hour or Nighttime DBP Adjusted for Other DBP Indexes**

| Outcomes<br>DBP Indexes Adjusted For | 24-Hour DBP <sup>a</sup> |       | Nighttime DBP <sup>a</sup> |       |
|--------------------------------------|--------------------------|-------|----------------------------|-------|
|                                      | HR (CI) <sup>b</sup>     | P     | HR (CI) <sup>b</sup>       | P     |
| <b>Total Mortality</b> (n = 2836)    |                          |       |                            |       |
| Conventional DBP                     | 1.12 (1.06 to 1.19)      | <.001 | 1.15 (1.10 to 1.20)        | <.001 |
| Automated office DBP                 | 1.18 (1.11 to 1.25)      | <.001 | 1.17 (1.11 to 1.22)        | <.001 |
| 24-hour DBP                          | NA                       | NA    | 1.18 (1.09 to 1.27)        | <.001 |
| Daytime DBP                          | 1.32 (1.17 to 1.48)      | <.001 | 1.16 (1.10 to 1.22)        | <.001 |
| Nighttime DBP                        | 0.98 (0.90 to 1.06)      | .61   | NA                         | NA    |
| Dipping ratio <sup>c</sup>           | 1.13 (1.08 to 1.18)      | <.001 | 1.15 (1.09 to 1.21)        | <.001 |
| <b>All CV Outcomes</b> (n = 2049)    |                          |       |                            |       |
| Conventional DBP                     | 1.27 (1.19 to 1.35)      | <.001 | 1.22 (1.16 to 1.29)        | <.001 |
| Automated office DBP                 | 1.36 (1.26 to 1.46)      | <.001 | 1.24 (1.18 to 1.31)        | <.001 |
| 24-hour DBP                          | NA                       | NA    | 1.13 (1.04 to 1.23)        | .005  |
| Daytime DBP                          | 1.58 (1.38 to 1.81)      | <.001 | 1.21 (1.14 to 1.28)        | <.001 |
| Nighttime BP                         | 1.16 (1.05 to 1.28)      | .003  | NA                         | NA    |
| Dipping ratio <sup>c</sup>           | 1.29 (1.23 to 1.36)      | <.001 | 1.30 (1.23 to 1.38)        | <.001 |
| <b>CV Mortality</b> (n = 1073)       |                          |       |                            |       |
| Conventional DBP                     | 1.27 (1.16 to 1.38)      | <.001 | 1.25 (1.17 to 1.34)        | <.001 |
| Automated office DBP                 | 1.40 (1.27 to 1.54)      | <.001 | 1.29 (1.20 to 1.38)        | <.001 |
| 24-hour DBP                          | NA                       | NA    | 1.20 (1.07 to 1.35)        | .002  |
| Daytime DBP                          | 1.63 (1.36 to 1.96)      | <.001 | 1.25 (1.15 to 1.35)        | <.001 |
| Nighttime DBP                        | 1.09 (0.95 to 1.24)      | .22   | NA                         | NA    |
| Dipping ratio <sup>c</sup>           | 1.28 (1.19 to 1.38)      | <.001 | 1.30 (1.20 to 1.40)        | <.001 |
| <b>Coronary Outcomes</b> (n = 922)   |                          |       |                            |       |
| Conventional DBP                     | 1.16 (1.06 to 1.28)      | .002  | 1.17 (1.08 to 1.26)        | <.001 |
| Automated office DBP                 | 1.20 (1.08 to 1.33)      | <.001 | 1.17 (1.09 to 1.26)        | <.001 |
| 24-hour DBP                          | NA                       | NA    | 1.16 (1.03 to 1.32)        | .02   |
| Daytime DBP                          | 1.40 (1.15 to 1.71)      | <.001 | 1.17 (1.08 to 1.28)        | <.001 |
| Nighttime DBP                        | 1.02 (0.88 to 1.17)      | .82   | NA                         | NA    |
| Dipping ratio <sup>c</sup>           | 1.16 (1.08 to 1.26)      | <.001 | 1.17 (1.08 to 1.27)        | <.001 |
| <b>Stroke</b> (n = 822)              |                          |       |                            |       |
| Conventional DBP                     | 1.35 (1.23 to 1.49)      | <.001 | 1.28 (1.18 to 1.39)        | <.001 |
| Automated office DBP                 | 1.44 (1.28 to 1.61)      | <.001 | 1.30 (1.20 to 1.41)        | <.001 |
| 24-hour DBP                          | NA                       | NA    | 1.15 (1.00 to 1.31)        | .05   |
| Daytime DBP                          | 1.67 (1.35 to 2.06)      | <.001 | 1.25 (1.14 to 1.37)        | <.001 |
| Nighttime DBP                        | 1.24 (1.06 to 1.44)      | .006  | NA                         | NA    |
| Dipping ratio <sup>c</sup>           | 1.40 (1.28 to 1.52)      | <.001 | 1.43 (1.31 to 1.57)        | <.001 |

Abbreviations: CI, 95% confidence interval; CV, cardiovascular; DBP, diastolic blood pressure; HR, hazard ratio; NA, not applicable.

<sup>a</sup> All models accounted for cohort, sex, age, body mass index, smoking and drinking, serum cholesterol, antihypertensive drug intake, history of cardiovascular disease and diabetes mellitus and were constructed, using the residual method (see Statistical Analysis).

<sup>b</sup> Hazard ratios express the risk for increments of 10-mm Hg in DBP and 0.10 in the dipping ratio.

<sup>c</sup> The dipping ratio is calculated by dividing nighttime by daytime DBP.

**eTable 7. Association of Outcomes With SBP Indexes Without or With Adjustment for 24-Hour or Nighttime SBP Among 8873 Untreated Participants**

| Outcomes<br>SBP Indexes            | Adjusted <sup>a</sup> |       | Additionally Adjusted<br>for 24-Hour SBP <sup>b</sup> |       | Additionally Adjusted<br>for Nighttime SBP <sup>c</sup> |       |
|------------------------------------|-----------------------|-------|-------------------------------------------------------|-------|---------------------------------------------------------|-------|
|                                    | HR (CI) <sup>c</sup>  | P     | HR (CI) <sup>c</sup>                                  | P     | HR (CI) <sup>c</sup>                                    | P     |
| <b>Total Mortality (n = 1754)</b>  |                       |       |                                                       |       |                                                         |       |
| Conventional SBP                   | 1.16 (1.10 to 1.22)   | <.001 | 1.06 (1.00 to 1.13)                                   | .06   | 1.07 (1.01 to 1.13)                                     | .03   |
| Automated office SBP               | 1.14 (1.09 to 1.20)   | <.001 | 1.01 (0.95 to 1.08)                                   | .66   | 1.05 (0.99 to 1.11)                                     | .11   |
| 24-hour SBP                        | 1.29 (1.21 to 1.38)   | <.001 | NA                                                    | NA    | 1.03 (0.90 to 1.18)                                     | .69   |
| Daytime SBP                        | 1.22 (1.14 to 1.30)   | <.001 | 0.84 (0.71 to 0.98)                                   | .03   | 1.03 (0.95 to 1.12)                                     | .45   |
| Nighttime SBP                      | 1.28 (1.21 to 1.36)   | <.001 | 1.26 (1.12 to 1.41)                                   | <.001 | NA                                                      | NA    |
| Dipping ratio <sup>d</sup>         | 1.13 (1.08 to 1.20)   | <.001 | 1.10 (1.04 to 1.16)                                   | <.001 | 0.98 (0.92 to 1.05)                                     | .55   |
| <b>All CV Outcomes (n = 1227)</b>  |                       |       |                                                       |       |                                                         |       |
| Conventional SBP                   | 1.26 (1.19 to 1.34)   | <.001 | 1.07 (1.00 to 1.15)                                   | .06   | 1.12 (1.05 to 1.20)                                     | <.001 |
| Automated office SBP               | 1.27 (1.20 to 1.35)   | <.001 | 1.05 (0.97 to 1.13)                                   | .25   | 1.14 (1.06 to 1.21)                                     | <.001 |
| 24-hour SBP                        | 1.54 (1.42 to 1.65)   | <.001 | NA                                                    | NA    | 1.37 (1.17 to 1.61)                                     | <.001 |
| Daytime SBP                        | 1.43 (1.33 to 1.54)   | <.001 | 0.90 (0.75 to 1.08)                                   | .26   | 1.20 (1.09 to 1.33)                                     | <.001 |
| Nighttime BP                       | 1.41 (1.33 to 1.51)   | <.001 | 1.11 (0.97 to 1.28)                                   | .12   | NA                                                      | NA    |
| Dipping ratio <sup>d</sup>         | 1.11 (1.04 to 1.19)   | <.001 | 1.05 (0.98 to 1.11)                                   | .14   | 0.86 (0.80 to 0.93)                                     | <.001 |
| <b>CV Mortality (n = 604)</b>      |                       |       |                                                       |       |                                                         |       |
| Conventional SBP                   | 1.27 (1.17 to 1.37)   | <.001 | 1.04 (0.94 to 1.14)                                   | .47   | 1.09 (1.00 to 1.19)                                     | .06   |
| Automated office SBP               | 1.35 (1.24 to 1.46)   | <.001 | 1.08 (0.97 to 1.20)                                   | .17   | 1.17 (1.07 to 1.28)                                     | .001  |
| 24-hour SBP                        | 1.65 (1.49 to 1.82)   | <.001 | NA                                                    | NA    | 1.36 (1.09 to 1.70)                                     | .006  |
| Daytime SBP                        | 1.53 (1.38 to 1.68)   | <.001 | 0.88 (0.68 to 1.14)                                   | .33   | 1.22 (1.06 to 1.39)                                     | .004  |
| Nighttime SBP                      | 1.51 (1.39 to 1.65)   | <.001 | 1.20 (0.99 to 1.45)                                   | .06   | NA                                                      | NA    |
| Dipping ratio <sup>d</sup>         | 1.16 (1.06 to 1.27)   | <.001 | 1.08 (0.99 to 1.18)                                   | .09   | 0.86 (0.77 to 0.96)                                     | .008  |
| <b>Coronary Outcomes (n = 566)</b> |                       |       |                                                       |       |                                                         |       |
| Conventional SBP                   | 1.20 (1.10 to 1.30)   | <.001 | 1.03 (0.92 to 1.14)                                   | .61   | 1.07 (0.98 to 1.18)                                     | .15   |
| Automated office SBP               | 1.26 (1.16 to 1.37)   | <.001 | 1.08 (0.96 to 1.22)                                   | .19   | 1.14 (1.03 to 1.26)                                     | .008  |
| 24-hour SBP                        | 1.44 (1.29 to 1.61)   | <.001 | NA                                                    | NA    | 1.29 (1.01 to 1.64)                                     | .04   |
| Daytime SBP                        | 1.37 (1.23 to 1.52)   | <.001 | 0.91 (0.68 to 1.21)                                   | .53   | 1.17 (1.01 to 1.35)                                     | .04   |
| Nighttime SBP                      | 1.35 (1.23 to 1.49)   | <.001 | 1.11 (0.90 to 1.37)                                   | .31   | NA                                                      | NA    |
| Dipping ratio <sup>d</sup>         | 1.11 (1.01 to 1.22)   | .04   | 1.05 (0.95 to 1.15)                                   | .34   | 0.89 (0.79 to 1.00)                                     | .05   |
| <b>Stroke (n = 463)</b>            |                       |       |                                                       |       |                                                         |       |
| Conventional SBP                   | 1.41 (1.28 to 1.55)   | <.001 | 1.18 (1.04 to 1.32)                                   | .007  | 1.23 (1.11 to 1.38)                                     | <.001 |
| Automated office SBP               | 1.38 (1.25 to 1.51)   | <.001 | 1.11 (0.98 to 1.26)                                   | .10   | 1.21 (1.09 to 1.34)                                     | <.001 |
| 24-hour SBP                        | 1.69 (1.50 to 1.90)   | <.001 | NA                                                    | NA    | 1.45 (1.12 to 1.87)                                     | .004  |
| Daytime SBP                        | 1.59 (1.41 to 1.78)   | <.001 | 1.03 (0.77 to 1.38)                                   | .84   | 1.30 (1.12 to 1.52)                                     | .001  |
| Nighttime SBP                      | 1.52 (1.38 to 1.68)   | <.001 | 1.16 (0.93 to 1.44)                                   | .18   | NA                                                      | NA    |
| Dipping ratio <sup>d</sup>         | 1.12 (1.02 to 1.24)   | .02   | 1.04 (0.94 to 1.15)                                   | .41   | 0.81 (0.72 to 0.92)                                     | .001  |

Abbreviations: CI, 95% confidence interval; CV, cardiovascular; HR, hazard ratio; SBP, systolic blood pressure; NA, not applicable.

<sup>a</sup> All models accounted for cohort, sex, age, body mass index, smoking and drinking, serum cholesterol, antihypertensive drug intake, history of cardiovascular disease and diabetes mellitus.

<sup>b</sup> Models including two correlated SBP indexes were constructed, using the residual method (see Statistical Analysis).

<sup>c</sup> Hazard ratios express the risk for increments of 20 mm Hg in SBP and 0.10 in the dipping ratio.

<sup>d</sup> The dipping ratio is calculated by dividing nighttime by daytime SBP.

**eTable 8. Association of Outcomes With 24-Hour or Nighttime SBP Adjusted for Other SBP Indexes Among 8873 Untreated Participants**

| Outcomes<br>SBP Indexes Adjusted For | 24-Hour SBP <sup>a</sup> |       | Nighttime SBP <sup>a</sup> |       |
|--------------------------------------|--------------------------|-------|----------------------------|-------|
|                                      | HR (CI) <sup>b</sup>     | P     | HR (CI) <sup>b</sup>       | P     |
| <b>Total Mortality</b> (n = 1754)    |                          |       |                            |       |
| Conventional SBP                     | 1.24 (1.14 to 1.34)      | <.001 | 1.24 (1.16 to 1.32)        | <.001 |
| Automated office SBP                 | 1.28 (1.17 to 1.40)      | <.001 | 1.25 (1.17 to 1.33)        | <.001 |
| 24-hour SBP                          | NA                       | NA    | 1.26 (1.12 to 1.41)        | <.001 |
| Daytime SBP                          | 1.54 (1.30 to 1.82)      | <.001 | 1.26 (1.17 to 1.36)        | <.001 |
| Nighttime SBP                        | 1.03 (0.90 to 1.18)      | .69   | NA                         | NA    |
| Dipping ratio <sup>c</sup>           | 1.27 (1.18 to 1.36)      | <.001 | 1.30 (1.21 to 1.40)        | <.001 |
| <b>All CV Outcomes</b> (n = 1227)    |                          |       |                            |       |
| Conventional SBP                     | 1.45 (1.33 to 1.60)      | <.001 | 1.33 (1.24 to 1.43)        | <.001 |
| Automated office SBP                 | 1.47 (1.33 to 1.63)      | <.001 | 1.33 (1.23 to 1.43)        | <.001 |
| 24-hour SBP                          | NA                       | NA    | 1.11 (0.97 to 1.28)        | .12   |
| Daytime SBP                          | 1.70 (1.40 to 2.05)      | <.001 | 1.27 (1.16 to 1.38)        | <.001 |
| Nighttime BP                         | 1.37 (1.17 to 1.61)      | <.001 | NA                         | NA    |
| Dipping ratio <sup>c</sup>           | 1.52 (1.41 to 1.64)      | <.001 | 1.56 (1.44 to 1.70)        | <.001 |
| <b>CV Mortality</b> (n = 604)        |                          |       |                            |       |
| Conventional SBP                     | 1.60 (1.42 to 1.81)      | <.001 | 1.45 (1.32 to 1.60)        | <.001 |
| Automated office SBP                 | 1.54 (1.34 to 1.77)      | <.001 | 1.40 (1.27 to 1.54)        | <.001 |
| 24-hour SBP                          | NA                       | NA    | 1.20 (0.99 to 1.45)        | .06   |
| Daytime SBP                          | 1.86 (1.43 to 2.42)      | <.001 | 1.35 (1.20 to 1.52)        | <.001 |
| Nighttime SBP                        | 1.36 (1.09 to 1.70)      | .01   | NA                         | NA    |
| Dipping ratio <sup>c</sup>           | 1.61 (1.46 to 1.79)      | <.001 | 1.67 (1.50 to 1.86)        | <.001 |
| <b>Coronary Outcomes</b> (n = 566)   |                          |       |                            |       |
| Conventional SBP                     | 1.41 (1.23 to 1.62)      | <.001 | 1.30 (1.17 to 1.45)        | <.001 |
| Automated office SBP                 | 1.34 (1.15 to 1.57)      | <.001 | 1.26 (1.12 to 1.40)        | <.001 |
| 24-hour SBP                          | NA                       | NA    | 1.11 (0.90 to 1.37)        | .31   |
| Daytime SBP                          | 1.58 (1.17 to 2.11)      | .002  | 1.23 (1.08 to 1.41)        | .002  |
| Nighttime SBP                        | 1.29 (1.01 to 1.64)      | .04   | NA                         | NA    |
| Dipping ratio <sup>c</sup>           | 1.43 (1.27 to 1.59)      | <.001 | 1.46 (1.29 to 1.64)        | <.001 |
| <b>Stroke</b> (n = 463)              |                          |       |                            |       |
| Conventional SBP                     | 1.51 (1.30 to 1.75)      | <.001 | 1.38 (1.23 to 1.55)        | <.001 |
| Automated office SBP                 | 1.54 (1.31 to 1.82)      | <.001 | 1.39 (1.24 to 1.56)        | <.001 |
| 24-hour SBP                          | NA                       | NA    | 1.16 (0.93 to 1.44)        | .18   |
| Daytime SBP                          | 1.64 (1.21 to 2.22)      | .001  | 1.31 (1.15 to 1.50)        | <.001 |
| Nighttime SBP                        | 1.45 (1.12 to 1.87)      | <.001 | NA                         | NA    |
| Dipping ratio <sup>c</sup>           | 1.67 (1.47 to 1.89)      | <.001 | 1.76 (1.55 to 2.01)        | <.001 |

Abbreviations: CI, 95% confidence interval; CV, cardiovascular; HR, hazard ratio; SBP, systolic blood pressure; NA, not applicable.

<sup>a</sup> All models accounted for cohort, sex, age, body mass index, smoking and drinking, serum cholesterol, antihypertensive drug intake, history of cardiovascular disease and diabetes mellitus and were constructed, using the residual method (see Statistical Analysis).

<sup>b</sup> Hazard ratios express the risk for increments of 20 mm Hg in SBP and 0.10 in the dipping ratio.

<sup>c</sup> The dipping ratio is the nighttime divided by the daytime SBP.

**eTable 9. Association of Outcomes With SBP Indexes During Wakefulness and Sleep in 7133 Participants Without or With Adjustment for 24-Hour or Asleep SBP**

| Outcomes<br>SBP Indexes            | Adjusted <sup>a,b</sup> |       | Additionally Adjusted<br>for 24-Hour SBP <sup>a,c</sup> |       | Additionally Adjusted<br>for Asleep SBP <sup>a,c</sup> |      |
|------------------------------------|-------------------------|-------|---------------------------------------------------------|-------|--------------------------------------------------------|------|
|                                    | HR (CI) <sup>d</sup>    | P     | HR (CI) <sup>d</sup>                                    | P     | HR (CI) <sup>d</sup>                                   | P    |
| <b>Total Mortality (n = 1566)</b>  |                         |       |                                                         |       |                                                        |      |
| Conventional SBP                   | 1.14 (1.08 to 1.21)     | <.001 | 1.07 (1.00 to 1.14)                                     | .05   | 1.07 (1.01 to 1.14)                                    | .02  |
| Automated office SBP               | 1.11 (1.05 to 1.17)     | <.001 | 0.96 (0.89 to 1.04)                                     | .35   | 1.00 (0.94 to 1.07)                                    | .95  |
| 24-hour SBP                        | 1.28 (1.19 to 1.39)     | <.001 | NA                                                      | NA    | 1.02 (0.87 to 1.19)                                    | .82  |
| Awake SBP                          | 1.22 (1.13 to 1.32)     | <.001 | 0.71 (0.55 to 0.93)                                     | .01   | 1.02 (0.91 to 1.13)                                    | .75  |
| Asleep SBP                         | 1.29 (1.20 to 1.38)     | <.001 | 1.27 (1.10 to 1.47)                                     | <.001 | NA                                                     | NA   |
| Dipping ratio <sup>e</sup>         | 1.14 (1.07 to 1.22)     | <.001 | 1.12 (1.05 to 1.20)                                     | <.001 | 1.00 (0.92 to 1.08)                                    | .98  |
| <b>All CV Outcomes (n = 1048)</b>  |                         |       |                                                         |       |                                                        |      |
| Conventional SBP                   | 1.25 (1.17 to 1.33)     | <.001 | 1.06 (0.98 to 1.14)                                     | .15   | 1.10 (1.02 to 1.18)                                    | .009 |
| Automated office SBP               | 1.25 (1.17 to 1.33)     | <.001 | 0.94 (0.86 to 1.04)                                     | .24   | 1.05 (0.97 to 1.14)                                    | .21  |
| 24-hour SBP                        | 1.65 (1.50 to 1.80)     | <.001 | NA                                                      | NA    | 1.29 (1.07 to 1.57)                                    | .008 |
| Awake SBP                          | 1.54 (1.41 to 1.68)     | <.001 | 0.69 (0.50 to 0.96)                                     | .03   | 1.19 (1.04 to 1.35)                                    | .009 |
| Asleep BP                          | 1.57 (1.45 to 1.70)     | <.001 | 1.28 (1.08 to 1.52)                                     | .005  | NA                                                     | NA   |
| Dipping ratio <sup>e</sup>         | 1.17 (1.08 to 1.27)     | <.001 | 1.13 (1.04 to 1.23)                                     | .004  | 0.89 (0.80 to 0.98)                                    | .02  |
| <b>CV Mortality (n = 521)</b>      |                         |       |                                                         |       |                                                        |      |
| Conventional SBP                   | 1.32 (1.20 to 1.44)     | <.001 | 1.14 (1.02 to 1.27)                                     | .02   | 1.17 (1.06 to 1.29)                                    | .002 |
| Automated office SBP               | 1.23 (1.12 to 1.35)     | <.001 | 0.92 (0.81 to 1.05)                                     | .22   | 1.02 (0.92 to 1.14)                                    | .67  |
| 24-hour SBP                        | 1.68 (1.48 to 1.91)     | <.001 | NA                                                      | NA    | 1.21 (0.93 to 1.58)                                    | .16  |
| Awake SBP                          | 1.55 (1.37 to 1.76)     | <.001 | 0.65 (0.42 to 1.01)                                     | .06   | 1.15 (0.96 to 1.38)                                    | .12  |
| Asleep SBP                         | 1.63 (1.45 to 1.83)     | <.001 | 1.40 (1.10 to 1.78)                                     | .006  | NA                                                     | NA   |
| Dipping ratio <sup>e</sup>         | 1.21 (1.08 to 1.35)     | .001  | 1.17 (1.04 to 1.31)                                     | .007  | 0.91 (0.79 to 1.04)                                    | .18  |
| <b>Coronary Outcomes (n = 409)</b> |                         |       |                                                         |       |                                                        |      |
| Conventional SBP                   | 1.18 (1.06 to 1.31)     | .002  | 0.98 (0.86 to 1.11)                                     | .77   | 1.02 (0.91 to 1.15)                                    | .71  |
| Automated office SBP               | 1.22 (1.09 to 1.35)     | <.001 | 0.93 (0.79 to 1.08)                                     | .34   | 1.01 (0.89 to 1.15)                                    | .83  |
| 24-hour SBP                        | 1.55 (1.35 to 1.79)     | <.001 | NA                                                      | NA    | 1.15 (0.84 to 1.57)                                    | .39  |
| Awake SBP                          | 1.46 (1.27 to 1.68)     | <.001 | 0.59 (0.34 to 1.04)                                     | .07   | 1.09 (0.88 to 1.36)                                    | .42  |
| Asleep SBP                         | 1.52 (1.34 to 1.73)     | <.001 | 1.36 (1.03 to 1.81)                                     | .03   | NA                                                     | NA   |
| Dipping ratio <sup>e</sup>         | 1.21 (1.06 to 1.39)     | .005  | 1.17 (1.02 to 1.34)                                     | .03   | 0.94 (0.80 to 1.11)                                    | .47  |
| <b>Stroke (n = 479)</b>            |                         |       |                                                         |       |                                                        |      |
| Conventional SBP                   | 1.30 (1.18 to 1.43)     | <.001 | 1.08 (0.97 to 1.21)                                     | .17   | 1.13 (1.02 to 1.26)                                    | .02  |
| Automated office SBP               | 1.34 (1.22 to 1.48)     | <.001 | 1.00 (0.87 to 1.15)                                     | .97   | 1.12 (1.00 to 1.26)                                    | .04  |
| 24-hour SBP                        | 1.84 (1.61 to 2.10)     | <.001 | NA                                                      | NA    | 1.43 (1.09 to 1.88)                                    | .01  |
| Awake SBP                          | 1.67 (1.47 to 1.90)     | <.001 | 0.62 (0.39 to 0.98)                                     | .04   | 1.25 (1.04 to 1.50)                                    | .02  |
| Asleep SBP                         | 1.72 (1.52 to 1.94)     | <.001 | 1.29 (1.01 to 1.66)                                     | .04   | NA                                                     | NA   |
| Dipping ratio <sup>e</sup>         | 1.18 (1.05 to 1.33)     | .005  | 1.14 (1.02 to 1.29)                                     | .03   | 0.85 (0.74 to 0.98)                                    | .03  |

Abbreviations: CI, 95% confidence interval; CV, cardiovascular; HR, hazard ratio; SBP, systolic blood pressure; NA, not applicable.

<sup>a</sup> In this analysis, we defined the awake and asleep periods of the day in 7133 participants (64.1%), who had kept a diary during ambulatory blood pressure monitoring.

<sup>b</sup> All models accounted for cohort, sex, age, body mass index, smoking and drinking, serum cholesterol, antihypertensive drug intake, history of cardiovascular disease and diabetes mellitus.

<sup>c</sup> Models including two correlated SBP indexes were constructed, using the residual method (see Statistical Analysis).

<sup>d</sup> Hazard ratios express the risk for increments of 20 mm Hg in SBP and 0.10 in the dipping ratio.

<sup>e</sup> The dipping ratio is calculated by dividing asleep by awake SBP.



**eTable 10. Association of Outcomes with 24-Hour or Asleep SBP Adjusted for Other SBP Indexes in 7133 Participants**

| Outcomes<br>SBP Indexes Adjusted For | 24-Hour SBP <sup>a</sup> |       | Asleep SBP <sup>a</sup> |       |
|--------------------------------------|--------------------------|-------|-------------------------|-------|
|                                      | HR (CI) <sup>b</sup>     | P     | HR (CI) <sup>b</sup>    | P     |
| <b>Total Mortality</b> (n = 1566)    |                          |       |                         |       |
| Conventional SBP                     | 1.23 (1.12 to 1.34)      | <.001 | 1.25 (1.16 to 1.34)     | <.001 |
| Automated office SBP                 | 1.33 (1.19 to 1.48)      | <.001 | 1.29 (1.19 to 1.40)     | <.001 |
| 24-hour SBP                          | NA                       | NA    | 1.27 (1.10 to 1.47)     | <.001 |
| Awake SBP                            | 1.81 (1.37 to 2.39)      | <.001 | 1.27 (1.15 to 1.41)     | <.001 |
| Asleep SBP                           | 1.02 (0.87 to 1.19)      | .82   | NA                      | NA    |
| Dipping ratio <sup>c</sup>           | 1.27 (1.17 to 1.37)      | <.001 | 1.29 (1.19 to 1.40)     | <.001 |
| <b>All CV Outcomes</b> (n = 1048)    |                          |       |                         |       |
| Conventional SBP                     | 1.58 (1.42 to 1.76)      | <.001 | 1.49 (1.36 to 1.63)     | <.001 |
| Automated office SBP                 | 1.74 (1.53 to 1.98)      | <.001 | 1.52 (1.38 to 1.67)     | <.001 |
| 24-hour SBP                          | NA                       | NA    | 1.28 (1.08 to 1.52)     | .005  |
| Awake SBP                            | 2.38 (1.70 to 3.34)      | <.001 | 1.39 (1.23 to 1.57)     | <.001 |
| Asleep BP                            | 1.29 (1.07 to 1.57)      | .008  | NA                      | NA    |
| Dipping ratio <sup>c</sup>           | 1.62 (1.48 to 1.78)      | <.001 | 1.68 (1.52 to 1.85)     | <.001 |
| <b>CV Mortality</b> (n = 521)        |                          |       |                         |       |
| Conventional SBP                     | 1.54 (1.33 to 1.79)      | <.001 | 1.52 (1.34 to 1.72)     | <.001 |
| Automated office SBP                 | 1.81 (1.52 to 2.16)      | <.001 | 1.61 (1.41 to 1.84)     | <.001 |
| 24-hour SBP                          | NA                       | NA    | 1.40 (1.10 to 1.78)     | .006  |
| Awake SBP                            | 2.60 (1.63 to 4.15)      | <.001 | 1.48 (1.25 to 1.75)     | <.001 |
| Asleep SBP                           | 1.21 (0.93 to 1.58)      | .16   | NA                      | NA    |
| Dipping ratio <sup>c</sup>           | 1.66 (1.45 to 1.88)      | <.001 | 1.72 (1.50 to 1.98)     | <.001 |
| <b>Coronary Outcomes</b> (n = 409)   |                          |       |                         |       |
| Conventional SBP                     | 1.58 (1.32 to 1.88)      | <.001 | 1.50 (1.30 to 1.74)     | <.001 |
| Automated office SBP                 | 1.68 (1.36 to 2.07)      | <.001 | 1.51 (1.29 to 1.76)     | <.001 |
| 24-hour SBP                          | NA                       | NA    | 1.36 (1.03 to 1.81)     | .03   |
| Awake SBP                            | 2.62 (1.47 to 4.65)      | .001  | 1.43 (1.17 to 1.75)     | <.001 |
| Asleep SBP                           | 1.15 (0.84 to 1.57)      | .39   | NA                      | NA    |
| Dipping ratio <sup>c</sup>           | 1.53 (1.32 to 1.76)      | <.001 | 1.57 (1.34 to 1.83)     | <.001 |
| <b>Stroke</b> (n = 479)              |                          |       |                         |       |
| Conventional SBP                     | 1.74 (1.5 to 2.03)       | <.001 | 1.62 (1.42 to 1.84)     | <.001 |
| Automated office SBP                 | 1.83 (1.52 to 2.21)      | <.001 | 1.60 (1.39 to 1.84)     | <.001 |
| 24-hour SBP                          | NA                       | NA    | 1.29 (1.01 to 1.66)     | .04   |
| Awake SBP                            | 2.97 (1.84 to 4.80)      | <.001 | 1.48 (1.24 to 1.76)     | <.001 |
| Asleep SBP                           | 1.43 (1.09 to 1.88)      | .01   | NA                      | NA    |
| Dipping ratio <sup>c</sup>           | 1.81 (1.59 to 2.07)      | <.001 | 1.88 (1.63 to 2.18)     | <.001 |

Abbreviations: CI, 95% confidence interval; CV, cardiovascular; HR, hazard ratio; SBP, systolic blood pressure; NA, not applicable.

<sup>a</sup> In this analysis, we defined the awake and asleep periods of the day in 7133 participants (64.1%), who had kept a diary during ambulatory blood pressure monitoring. All models accounted for cohort, sex, age, body mass index, smoking and drinking, serum cholesterol, antihypertensive drug intake, history of cardiovascular disease and diabetes mellitus and were constructed, using the residual method (see Statistical Analysis).

<sup>b</sup> Hazard ratios express the risk for increments of 20 mm Hg in SBP and 0.10 in the dipping ratio.

<sup>c</sup> The dipping ratio is calculated by dividing asleep by awake SBP.

**eTable 11. Sensitivity Analysis Excluding Cohorts**

| Outcomes<br>Population         | N° Event/<br>N° at Risk | 24-Hour SBP                |                 | Nighttime SBP              |                 |
|--------------------------------|-------------------------|----------------------------|-----------------|----------------------------|-----------------|
|                                |                         | HR (CI) <sup>a</sup>       | <i>P</i>        | HR (CI) <sup>a</sup>       | <i>P</i>        |
| <b>Total Mortality</b>         |                         |                            |                 |                            |                 |
| <b>All Cohorts<sup>b</sup></b> | <b>2836/11,135</b>      | <b>1.22 (1.16 to 1.28)</b> | <b>&lt;.001</b> | <b>1.23 (1.17 to 1.28)</b> | <b>&lt;.001</b> |
| Excluding <sup>c</sup>         |                         |                            |                 |                            |                 |
| Ohasama                        | 2115/9600               | 1.21 (1.15 to 1.29)        | <.001           | 1.22 (1.16 to 1.28)        | <.001           |
| Small cohorts                  | 2787/9479               | 1.22 (1.16 to 1.29)        | <.001           | 1.22 (1.17 to 1.28)        | <.001           |
| Noordkempen                    | 2527/9705               | 1.21 (1.14 to 1.27)        | <.001           | 1.21 (1.16 to 1.27)        | <.001           |
| Uppsala                        | 1907/10,021             | 1.32 (1.23 to 1.41)        | <.001           | 1.33 (1.25 to 1.41)        | <.001           |
| Copenhagen                     | 2297/8987               | 1.19 (1.13 to 1.26)        | <.001           | 1.21 (1.15 to 1.27)        | <.001           |
| Dublin                         | 2800/10,202             | 1.22 (1.16 to 1.28)        | <.001           | 1.22 (1.17 to 1.28)        | <.001           |
| Maracaibo                      | 2697/10,545             | 1.19 (1.13 to 1.26)        | <.001           | 1.20 (1.15 to 1.26)        | <.001           |
| Montevideo                     | 2722/9406               | 1.23 (1.16 to 1.29)        | <.001           | 1.23 (1.17 to 1.28)        | <.001           |
| <b>CV Outcomes</b>             |                         |                            |                 |                            |                 |
| <b>All Cohorts<sup>b</sup></b> | <b>2049/11,135</b>      | <b>1.45 (1.37 to 1.54)</b> | <b>&lt;.001</b> | <b>1.36 (1.30 to 1.43)</b> | <b>&lt;.001</b> |
| Excluding <sup>c</sup>         |                         |                            |                 |                            |                 |
| Ohasama                        | 1681/9600               | 1.42 (1.34 to 1.51)        | <.001           | 1.34 (1.28 to 1.42)        | <.001           |
| Small cohorts                  | 1995/9479               | 1.44 (1.36 to 1.53)        | <.001           | 1.35 (1.29 to 1.42)        | <.001           |
| Noordkempen                    | 1768/9705               | 1.44 (1.35 to 1.53)        | <.001           | 1.35 (1.29 to 1.42)        | <.001           |
| Uppsala                        | 1363/10,021             | 1.62 (1.50 to 1.75)        | <.001           | 1.53 (1.43 to 1.64)        | <.001           |
| Copenhagen                     | 1683/8987               | 1.42 (1.34 to 1.52)        | <.001           | 1.33 (1.26 to 1.40)        | <.001           |
| Dublin                         | 2030/10,202             | 1.45 (1.37 to 1.54)        | <.001           | 1.36 (1.30 to 1.43)        | <.001           |
| Maracaibo                      | 1919/10,545             | 1.45 (1.37 to 1.54)        | <.001           | 1.36 (1.29 to 1.43)        | <.001           |
| Montevideo                     | 1904/9406               | 1.45 (1.36 to 1.54)        | <.001           | 1.36 (1.30 to 1.43)        | <.001           |

Abbreviations: CI, confidence interval; CV, cardiovascular; HR, hazard ratio; SBP, systolic blood pressure.

<sup>a</sup> Hazard ratios express the risk per 20 mm Hg increment in 24-hour or nighttime SBP. HRs accounted for cohort (random effect), sex, age, body mass index, smoking and drinking, serum total cholesterol, antihypertensive drug intake, history of CV disease and diabetes mellitus.

<sup>b</sup> The analyses included 11,135 participants.

<sup>c</sup> Identifies the excluded cohort. All cohorts with fewer than 500 participants were excluded in a single run. These cohorts included JingNing (n = 352), Novosibirsk (n = 283), Kraków (n = 355), Gdańsk (n = 202), Pilsen (n = 159) and Padova (n = 305).

**eTable 12. Improvement in Model Performance by Adding 24-Hour or Nighttime SBP to Another SBP Index**

| Outcomes<br>SBP Index to Which<br>24-Hour or Nighttime SBP<br>Was Added | AUC (CI)<br>Basic Model <sup>a</sup> | $\Delta$ AUC (CI) <sup>b</sup> |                            |
|-------------------------------------------------------------------------|--------------------------------------|--------------------------------|----------------------------|
|                                                                         |                                      | Adding 24-Hour SBP             | Adding Nighttime SBP       |
| <b>Total Mortality</b> (n = 2836)                                       |                                      |                                |                            |
| Conventional SBP                                                        | 0.83 (0.82 to 0.85)                  | 0.0013 (0.0001 to 0.0024)      | 0.0024 (0.0010 to 0.0038)  |
| Automated office SBP                                                    | 0.83 (0.82 to 0.85)                  | 0.0016 (0.0003 to 0.0029)      | 0.0027 (0.0010 to 0.0044)  |
| 24-hour SBP                                                             | 0.83 (0.82 to 0.85)                  | NA                             | 0.0013 (0.0001 to 0.0024)  |
| Daytime SBP                                                             | 0.83 (0.82 to 0.85)                  | 0.0016 (0.0001 to 0.0032)      | 0.0023 (0.0006 to 0.0040)  |
| Nighttime SBP                                                           | 0.83 (0.82 to 0.85)                  | NC <sup>c</sup>                | NA                         |
| Dipping ratio <sup>d</sup>                                              | 0.83 (0.82 to 0.85)                  | 0.0017 (0.0003 to 0.0032)      | 0.0018 (0.0002 to 0.0032)  |
| <b>All CV Outcomes</b> (n = 2049)                                       |                                      |                                |                            |
| Conventional SBP                                                        | 0.84 (0.83 to 0.85)                  | 0.0057 (0.0033 to 0.0082)      | 0.0058 (0.0034 to 0.0082)  |
| Automated office SBP                                                    | 0.84 (0.83 to 0.85)                  | 0.0048 (0.0025 to 0.0071)      | 0.0050 (0.0028 to 0.0072)  |
| 24-hour SBP                                                             | 0.84 (0.83 to 0.86)                  | NA                             | 0.0005 (−0.0002 to 0.0012) |
| Daytime SBP                                                             | 0.84 (0.83 to 0.86)                  | 0.0034 (0.0015 to 0.0052)      | 0.0031 (0.0014 to 0.0048)  |
| Nighttime SBP                                                           | 0.84 (0.83 to 0.86)                  | 0.0006 (−0.0002 to 0.0015)     | NA                         |
| Dipping ratio <sup>d</sup>                                              | 0.84 (0.83 to 0.85)                  | 0.0075 (0.0047 to 0.0103)      | 0.0071 (0.0043 to 0.0099)  |
| <b>CV Mortality</b> (n = 1073)                                          |                                      |                                |                            |
| Conventional SBP                                                        | 0.87 (0.86 to 0.89)                  | 0.0037 (0.0012 to 0.0062)      | 0.0046 (0.0019 to 0.0073)  |
| Automated office SBP                                                    | 0.87 (0.86 to 0.89)                  | 0.0047 (0.0020 to 0.0074)      | 0.0052 (0.0022 to 0.0082)  |
| 24-hour SBP                                                             | 0.88 (0.86 to 0.89)                  | NA                             | 0.0009 (−0.0004 to 0.0023) |
| Daytime SBP                                                             | 0.88 (0.86 to 0.89)                  | 0.0025 (0.0002 to 0.0048)      | 0.0029 (0.0004 to 0.0054)  |
| Nighttime SBP                                                           | 0.88 (0.86 to 0.89)                  | NC <sup>c</sup>                | NA                         |
| Dipping ratio <sup>d</sup>                                              | 0.87 (0.86 to 0.89)                  | 0.0055 (0.0023 to 0.0087)      | 0.0055 (0.0022 to 0.0087)  |
| <b>Coronary Outcomes</b> (n = 922)                                      |                                      |                                |                            |
| Conventional SBP                                                        | 0.86 (0.85 to 0.87)                  | 0.0038 (0.0014 to 0.0063)      | 0.0033 (0.0011 to 0.0055)  |
| Automated office SBP                                                    | 0.86 (0.85 to 0.88)                  | 0.0023 (0.0002 to 0.0044)      | 0.0022 (0.0002 to 0.0042)  |
| 24-hour SBP                                                             | 0.86 (0.85 to 0.88)                  | NA                             | 0.0001 (−0.0007 to 0.0009) |
| Daytime SBP                                                             | 0.86 (0.85 to 0.88)                  | 0.0014 (−0.0002 to 0.0029)     | 0.0011 (−0.0004 to 0.0027) |
| Nighttime SBP                                                           | 0.86 (0.85 to 0.88)                  | NC <sup>c</sup>                | NA                         |
| Dipping ratio <sup>d</sup>                                              | 0.86 (0.84 to 0.87)                  | 0.0049 (0.0018 to 0.0079)      | 0.0045 (0.0016 to 0.0074)  |
| <b>Stroke</b> (n = 822)                                                 |                                      |                                |                            |
| Conventional SBP                                                        | 0.84 (0.82 to 0.86)                  | 0.0073 (0.0028 to 0.0118)      | 0.0068 (0.0025 to 0.0110)  |
| Automated office SBP                                                    | 0.84 (0.82 to 0.86)                  | 0.0076 (0.0027 to 0.0124)      | 0.0069 (0.0026 to 0.0112)  |
| 24-hour SBP                                                             | 0.85 (0.83 to 0.87)                  | NA                             | 0.0002 (−0.0012 to 0.0016) |
| Daytime SBP                                                             | 0.85 (0.83 to 0.87)                  | 0.0037 (0.0004 to 0.0069)      | 0.0034 (0.0002 to 0.0066)  |
| Nighttime SBP                                                           | 0.84 (0.83 to 0.86)                  | 0.0017 (−0.0004 to 0.0038)     | NA                         |
| Dipping ratio <sup>d</sup>                                              | 0.83 (0.82 to 0.85)                  | 0.0138 (0.0080 to 0.0196)      | 0.0135 (0.0077 to 0.0193)  |

Abbreviations: AUC, area under the receiver operating characteristic curve for the 10-year absolute risk; CI, 95% confidence interval; CV, cardiovascular;  $\Delta$ AUC, change in AUC; SBP, systolic blood pressure; NA, not applicable.

<sup>a</sup> Basic models included cohort, sex, age, body mass index, smoking and drinking, serum cholesterol, antihypertensive drug intake, history of cardiovascular disease and diabetes mellitus and another SBP index identified by the row label.

<sup>b</sup>  $\Delta$ AUC for adding 24-hour or nighttime SBP to a basic model already including covariables and another SBP index. Models were constructed using the residual method (see Statistical Analysis).

<sup>c</sup> NC indicates that the improvement in model performance was not calculated, because the hazard ratio for 24-hour SBP did not attain significance in multivariable-adjusted models already including nighttime SBP (**Table 3**).

<sup>d</sup> The dipping ratio is calculated by dividing nighttime by daytime SBP.

**eTable 13. Improvement in Model Performance by Adding 24-Hour or Nighttime DBP to Another DBP Index**

| Outcomes<br>DBP Index to Which<br>24-Hour or Nighttime DBP<br>Was Added | AUC (CI)<br>Basic Model <sup>a</sup> | $\Delta$ AUC (CI) <sup>b</sup> |                            |
|-------------------------------------------------------------------------|--------------------------------------|--------------------------------|----------------------------|
|                                                                         |                                      | Adding 24-Hour DBP             | Adding Nighttime DBP       |
| <b>Total Mortality</b> (n = 2836)                                       |                                      |                                |                            |
| Conventional DBP                                                        | 0.83 (0.82 to 0.84)                  | 0.0007 (−0.0001 to 0.0015)     | 0.0018 (0.0005 to 0.0030)  |
| Automated office DBP                                                    | 0.83 (0.82 to 0.85)                  | 0.0007 (−0.0003 to 0.0017)     | 0.0018 (0.0005 to 0.0032)  |
| 24-hour DBP                                                             | 0.83 (0.82 to 0.85)                  | NA                             | 0.0012 (0.0002 to 0.0022)  |
| Daytime DBP                                                             | 0.83 (0.82 to 0.85)                  | 0.0009 (−0.0001 to 0.0020)     | 0.0017 (0.0004 to 0.0030)  |
| Nighttime DBP                                                           | 0.83 (0.82 to 0.85)                  | NC <sup>c</sup>                | NA                         |
| Dipping ratio <sup>d</sup>                                              | 0.83 (0.82 to 0.85)                  | 0.0009 (−0.0001 to 0.0019)     | 0.0011 (0.0001 to 0.0021)  |
| <b>All CV Outcomes</b> (n = 2049)                                       |                                      |                                |                            |
| Conventional DBP                                                        | 0.84 (0.83 to 0.85)                  | 0.0028 (0.0009 to 0.0047)      | 0.0034 (0.0014 to 0.0053)  |
| Automated office DBP                                                    | 0.84 (0.83 to 0.85)                  | 0.0028 (0.0011 to 0.0045)      | 0.0033 (0.0014 to 0.0053)  |
| 24-hour DBP                                                             | 0.84 (0.83 to 0.85)                  | NA                             | 0.0006 (−0.0002 to 0.0014) |
| Daytime DBP                                                             | 0.84 (0.83 to 0.85)                  | 0.0025 (0.0007 to 0.0042)      | 0.0024 (0.0007 to 0.0041)  |
| Nighttime DBP                                                           | 0.84 (0.83 to 0.86)                  | 0.0001 (−0.0006 to 0.0008)     | NA                         |
| Dipping ratio <sup>d</sup>                                              | 0.84 (0.83 to 0.85)                  | 0.0042 (0.0020 to 0.0063)      | 0.0039 (0.0018 to 0.0059)  |
| <b>CV Mortality</b> (n = 1073)                                          |                                      |                                |                            |
| Conventional DBP                                                        | 0.87 (0.86 to 0.89)                  | 0.0019 (−0.0000 to 0.0038)     | 0.0032 (0.0009 to 0.0056)  |
| Automated office DBP                                                    | 0.87 (0.86 to 0.89)                  | 0.0028 (0.0004 to 0.0053)      | 0.0038 (0.0011 to 0.0066)  |
| 24-hour DBP                                                             | 0.87 (0.86 to 0.89)                  | NA                             | 0.0012 (−0.0002 to 0.0027) |
| Daytime DBP                                                             | 0.87 (0.86 to 0.89)                  | 0.0024 (0.0003 to 0.0044)      | 0.0027 (0.0005 to 0.0050)  |
| Nighttime DBP                                                           | 0.88 (0.86 to 0.89)                  | NC <sup>c</sup>                | NA                         |
| Dipping ratio <sup>d</sup>                                              | 0.87 (0.86 to 0.89)                  | 0.0022 (−0.0002 to 0.0046)     | 0.0020 (−0.0003 to 0.0043) |
| <b>Coronary Outcomes</b> (n = 922)                                      |                                      |                                |                            |
| Conventional DBP                                                        | 0.86 (0.85 to 0.87)                  | 0.0017 (0.0003 to 0.0032)      | 0.0016 (0.0002 to 0.0031)  |
| Automated office DBP                                                    | 0.86 (0.85 to 0.87)                  | 0.0015 (−0.0001 to 0.0031)     | 0.0014 (−0.0001 to 0.0029) |
| 24-hour DBP                                                             | 0.86 (0.85 to 0.88)                  | NA                             | 0.0000 (−0.0008 to 0.0009) |
| Daytime DBP                                                             | 0.86 (0.85 to 0.87)                  | 0.0009 (−0.0005 to 0.0024)     | 0.0007 (−0.0006 to 0.0020) |
| Nighttime DBP                                                           | 0.86 (0.85 to 0.88)                  | NC <sup>c</sup>                | NA                         |
| Dipping ratio <sup>d</sup>                                              | 0.86 (0.84 to 0.87)                  | 0.0024 (0.0005 to 0.0044)      | 0.0022 (0.0004 to 0.0039)  |
| <b>Stroke</b> (n = 822)                                                 |                                      |                                |                            |
| Conventional DBP                                                        | 0.84 (0.82 to 0.86)                  | 0.0055 (0.0013 to 0.0096)      | 0.0049 (0.0010 to 0.0089)  |
| Automated office DBP                                                    | 0.84 (0.82 to 0.86)                  | 0.0054 (0.0014 to 0.0094)      | 0.0049 (0.0013 to 0.0085)  |
| 24-hour DBP                                                             | 0.85 (0.83 to 0.87)                  | NA                             | 0.0005 (−0.0009 to 0.0019) |
| Daytime DBP                                                             | 0.85 (0.83 to 0.87)                  | 0.0031 (0.0001 to 0.0062)      | 0.0028 (−0.0002 to 0.0058) |
| Nighttime DBP                                                           | 0.84 (0.83 to 0.86)                  | 0.0016 (−0.0003 to 0.0034)     | NA                         |
| Dipping ratio <sup>d</sup>                                              | 0.83 (0.82 to 0.85)                  | 0.0094 (0.0045 to 0.0143)      | 0.0090 (0.0041 to 0.0140)  |

Abbreviations: AUC, area under the receiver operating characteristic curve for the 10-year absolute risk; CI, 95% confidence interval; CV, cardiovascular;  $\Delta$ AUC, change in AUC; DBP, Diastolic blood pressure; NA, not applicable.

<sup>a</sup> Basic models included cohort, sex, age, body mass index, smoking and drinking, serum cholesterol, antihypertensive drug intake, history of cardiovascular disease and diabetes mellitus and another DBP index identified by the row label.

<sup>b</sup>  $\Delta$ AUC for adding 24-hour or nighttime to a basic model already including covariables and another DBP index. Models were constructed using the residual method (see Statistical Analysis).

<sup>c</sup> NC indicates that the improvement in model performance was not calculated, because the hazard ratio for 24-hour DBP did not attain significance in multivariable-adjusted models already including nighttime DBP (**eTable 6**).

<sup>d</sup> The dipping ratio is calculated by dividing nighttime by daytime DBP.

**eTable 14. Improvement in Model Performance by Adding a SBP Index to 24-Hour or Nighttime SBP**

| Outcomes<br>SBP Index Added to 24-Hour<br>or Nighttime SBP | Added to 24-Hour SBP              |                            | Added to Nighttime SBP            |                            |
|------------------------------------------------------------|-----------------------------------|----------------------------|-----------------------------------|----------------------------|
|                                                            | Basic Model AUC (CI) <sup>a</sup> | ΔAUC (CI) <sup>b</sup>     | Basic Model AUC (CI) <sup>a</sup> | ΔAUC (CI) <sup>b</sup>     |
| <b>Total Mortality</b> (n = 2836)                          |                                   |                            |                                   |                            |
| Conventional SBP                                           | 0.83 (0.82 to 0.85)               | 0.0001 (−0.0004 to 0.0007) | 0.84 (0.82 to 0.85)               | 0.0000 (−0.0006 to 0.0005) |
| Automated office SBP                                       | 0.83 (0.82 to 0.85)               | NC <sup>c</sup>            | 0.84 (0.82 to 0.85)               | NC <sup>c</sup>            |
| 24-hour SBP                                                | 0.83 (0.82 to 0.85)               | NA                         | 0.84 (0.82 to 0.85)               | NC <sup>c</sup>            |
| Daytime SBP                                                | 0.83 (0.82 to 0.85)               | 0.0006 (−0.0004 to 0.0016) | 0.84 (0.82 to 0.85)               | NC <sup>c</sup>            |
| Nighttime SBP                                              | 0.83 (0.82 to 0.85)               | 0.0013 (0.0001 to 0.0024)  | 0.84 (0.82 to 0.85)               | NA                         |
| Systolic dipping ratio                                     | 0.83 (0.82 to 0.85)               | 0.0010 (−0.0005 to 0.0024) | 0.84 (0.82 to 0.85)               | NC <sup>c</sup>            |
| <b>All CV Outcomes</b> (n = 2049)                          |                                   |                            |                                   |                            |
| Conventional SBP                                           | 0.85 (0.83 to 0.86)               | NC <sup>c</sup>            | 0.85 (0.83 to 0.86)               | 0.0001 (−0.0007 to 0.0009) |
| Automated office SBP                                       | 0.85 (0.83 to 0.86)               | NC <sup>c</sup>            | 0.85 (0.83 to 0.86)               | 0.0003 (−0.0003 to 0.0010) |
| 24-hour SBP                                                | 0.85 (0.83 to 0.86)               | NA                         | 0.85 (0.83 to 0.86)               | 0.0006 (−0.0002 to 0.0015) |
| Daytime SBP                                                | 0.85 (0.83 to 0.86)               | 0.0006 (−0.0003 to 0.0014) | 0.85 (0.83 to 0.86)               | 0.0004 (−0.0002 to 0.0011) |
| Nighttime SBP                                              | 0.85 (0.83 to 0.86)               | 0.0005 (−0.0002 to 0.0012) | 0.85 (0.83 to 0.86)               | NA                         |
| Systolic dipping ratio                                     | 0.85 (0.83 to 0.86)               | 0.0010 (−0.0005 to 0.0024) | 0.85 (0.83 to 0.86)               | 0.0004 (−0.0003 to 0.0010) |
| <b>CV Mortality</b> (n = 1073)                             |                                   |                            |                                   |                            |
| Conventional SBP                                           | 0.88 (0.86 to 0.89)               | NC <sup>c</sup>            | 0.88 (0.86 to 0.89)               | 0.0002 (−0.0008 to 0.0012) |
| Automated office SBP                                       | 0.88 (0.86 to 0.89)               | NC <sup>c</sup>            | 0.88 (0.86 to 0.89)               | NC <sup>c</sup>            |
| 24-hour SBP                                                | 0.88 (0.86 to 0.89)               | NA                         | 0.88 (0.86 to 0.89)               | NC <sup>c</sup>            |
| Daytime SBP                                                | 0.88 (0.86 to 0.89)               | 0.0006 (−0.0006 to 0.0017) | 0.88 (0.86 to 0.89)               | NC <sup>c</sup>            |
| Nighttime SBP                                              | 0.88 (0.86 to 0.89)               | 0.0009 (−0.0004 to 0.0023) | 0.88 (0.86 to 0.89)               | NA                         |
| Systolic dipping ratio                                     | 0.88 (0.86 to 0.89)               | 0.0007 (−0.0002 to 0.0015) | 0.88 (0.86 to 0.89)               | NC <sup>d</sup>            |
| <b>Coronary Outcomes</b> (n = 922)                         |                                   |                            |                                   |                            |
| Conventional SBP                                           | 0.86 (0.85 to 0.88)               | NC <sup>c</sup>            | 0.86 (0.85 to 0.88)               | NC <sup>d</sup>            |
| Automated office SBP                                       | 0.86 (0.85 to 0.88)               | NC <sup>c</sup>            | 0.86 (0.85 to 0.88)               | 0.0007 (−0.0003 to 0.0017) |
| 24-hour SBP                                                | 0.86 (0.85 to 0.88)               | NA                         | 0.86 (0.85 to 0.88)               | NC <sup>c</sup>            |
| Daytime SBP                                                | 0.86 (0.85 to 0.88)               | NC <sup>c</sup>            | 0.86 (0.85 to 0.88)               | NC <sup>c</sup>            |
| Nighttime SBP                                              | 0.86 (0.85 to 0.88)               | 0.0001 (−0.0007 to 0.0009) | 0.86 (0.85 to 0.88)               | NA                         |
| Systolic dipping ratio                                     | 0.86 (0.85 to 0.88)               | 0.0003 (−0.0005 to 0.0011) | 0.86 (0.85 to 0.88)               | NC <sup>c</sup>            |
| <b>Stroke</b> (n = 822)                                    |                                   |                            |                                   |                            |
| Conventional SBP                                           | 0.85 (0.83 to 0.87)               | 0.0004 (−0.0010 to 0.0019) | 0.85 (0.83 to 0.86)               | 0.0014 (−0.0006 to 0.0034) |
| Automated office SBP                                       | 0.85 (0.83 to 0.87)               | NC <sup>c</sup>            | 0.85 (0.83 to 0.86)               | 0.0009 (−0.0006 to 0.0023) |
| 24-hour SBP                                                | 0.85 (0.83 to 0.87)               | NA                         | 0.85 (0.83 to 0.86)               | 0.0017 (−0.0004 to 0.0038) |
| Daytime SBP                                                | 0.85 (0.83 to 0.87)               | NC <sup>c</sup>            | 0.85 (0.83 to 0.86)               | 0.0014 (−0.0006 to 0.0033) |
| Nighttime SBP                                              | 0.85 (0.83 to 0.87)               | 0.0002 (−0.0012 to 0.0016) | 0.85 (0.83 to 0.86)               | NA                         |
| Systolic dipping ratio                                     | 0.85 (0.83 to 0.87)               | 0.0002 (−0.0012 to 0.0016) | 0.85 (0.83 to 0.86)               | 0.0014 (−0.0007 to 0.0034) |

Abbreviations: AUC, area under the receiver operating characteristic curve for the 10-year absolute risk; CI, 95% confidence interval; CV, cardiovascular; ΔAUC, change in AUC; SBP, systolic blood pressure; NA, not applicable.

<sup>a</sup> Basic models included cohort, sex, age, body mass index, smoking and drinking, serum cholesterol, antihypertensive drug intake, history of cardiovascular disease and diabetes mellitus and 24-hour or nighttime SBP.

<sup>b</sup> ΔAUC for adding a SBP index identified by the row label to a basic model already including covariables and 24-hour or nighttime SBP. Models were constructed using the residual method (see Statistical Analysis).

<sup>c</sup> NC indicates that the improvement in model performance was not calculated, because the hazard ratio for the SBP index did not attain significance in multivariable-adjusted models already including either 24-hour or nighttime SBP (**Table 2**).

**eTable 15. Improvement in Model Performance by Adding a DBP Index to 24-Hour or Nighttime DBP**

| Outcomes<br>DBP Index Added to 24-Hour<br>or Nighttime DBP | Added to 24-Hour DBP              |                                | Added to Nighttime DBP            |                                |
|------------------------------------------------------------|-----------------------------------|--------------------------------|-----------------------------------|--------------------------------|
|                                                            | Basic Model AUC (CI) <sup>a</sup> | $\Delta$ AUC (CI) <sup>b</sup> | Basic Model AUC (CI) <sup>a</sup> | $\Delta$ AUC (CI) <sup>b</sup> |
| <b>Total Mortality</b> (n = 2836)                          |                                   |                                |                                   |                                |
| Conventional DBP                                           | 0.83 (0.82 to 0.85)               | NC <sup>c</sup>                | 0.83 (0.82 to 0.85)               | NC <sup>c</sup>                |
| Automated office DBP                                       | 0.83 (0.82 to 0.85)               | NC <sup>c</sup>                | 0.83 (0.82 to 0.85)               | NC <sup>c</sup>                |
| 24-hour DBP                                                | 0.83 (0.82 to 0.85)               | NA                             | 0.83 (0.82 to 0.85)               | NC <sup>c</sup>                |
| Daytime DBP                                                | 0.83 (0.82 to 0.85)               | 0.0004 (−0.0003 to 0.0011)     | 0.83 (0.82 to 0.85)               | NC <sup>c</sup>                |
| Nighttime DBP                                              | 0.83 (0.82 to 0.85)               | 0.0012 (0.0002 to 0.0022)      | 0.83 (0.82 to 0.85)               | NA                             |
| Diastolic dipping ratio                                    | 0.83 (0.82 to 0.85)               | NC <sup>c</sup>                | 0.83 (0.82 to 0.85)               | NC <sup>c</sup>                |
| <b>All CV Outcomes</b> (n = 2049)                          |                                   |                                |                                   |                                |
| Conventional DBP                                           | 0.84 (0.82 to 0.85)               | NC <sup>c</sup>                | 0.84 (0.83 to 0.86)               | 0.0001 (−0.0005 to 0.0006)     |
| Automated office DBP                                       | 0.84 (0.82 to 0.85)               | NC <sup>c</sup>                | 0.84 (0.83 to 0.86)               | NC <sup>c</sup>                |
| 24-hour DBP                                                | 0.84 (0.82 to 0.85)               | NA                             | 0.84 (0.83 to 0.86)               | 0.0001 (−0.0006 to 0.0008)     |
| Daytime DBP                                                | 0.84 (0.82 to 0.85)               | 0.0006 (−0.0003 to 0.0014)     | 0.84 (0.83 to 0.86)               | 0.0000 (−0.0005 to 0.0005)     |
| Nighttime DBP                                              | 0.84 (0.82 to 0.85)               | 0.0006 (−0.0002 to 0.0014)     | 0.84 (0.83 to 0.86)               | NA                             |
| Diastolic dipping ratio                                    | 0.84 (0.82 to 0.85)               | NC <sup>c</sup>                | 0.84 (0.83 to 0.86)               | NC <sup>c</sup>                |
| <b>CV Mortality</b> (n = 1073)                             |                                   |                                |                                   |                                |
| Conventional DBP                                           | 0.87 (0.86 to 0.89)               | NC <sup>c</sup>                | 0.88 (0.86 to 0.89)               | NC <sup>c</sup>                |
| Automated office DBP                                       | 0.87 (0.86 to 0.89)               | 0.0005 (−0.0005 to 0.0016)     | 0.88 (0.86 to 0.89)               | NC <sup>c</sup>                |
| 24-hour DBP                                                | 0.87 (0.86 to 0.89)               | NA                             | 0.88 (0.86 to 0.89)               | NC <sup>c</sup>                |
| Daytime DBP                                                | 0.87 (0.86 to 0.89)               | 0.0010 (−0.0003 to 0.0022)     | 0.88 (0.86 to 0.89)               | NC <sup>c</sup>                |
| Nighttime DBP                                              | 0.87 (0.86 to 0.89)               | 0.0012 (−0.0002 to 0.0027)     | 0.88 (0.86 to 0.89)               | NA                             |
| Diastolic dipping ratio                                    | 0.87 (0.86 to 0.89)               | NC <sup>d</sup>                | 0.88 (0.86 to 0.89)               | NC <sup>d</sup>                |
| <b>Coronary Outcomes</b> (n = 922)                         |                                   |                                |                                   |                                |
| Conventional DBP                                           | 0.86 (0.85 to 0.88)               | NC <sup>c</sup>                | 0.86 (0.85 to 0.88)               | NC <sup>c</sup>                |
| Automated office DBP                                       | 0.86 (0.85 to 0.88)               | NC <sup>c</sup>                | 0.86 (0.85 to 0.88)               | NC <sup>c</sup>                |
| 24-hour DBP                                                | 0.86 (0.85 to 0.88)               | NA                             | 0.86 (0.85 to 0.88)               | NC <sup>c</sup>                |
| Daytime DBP                                                | 0.86 (0.85 to 0.88)               | NC <sup>c</sup>                | 0.86 (0.85 to 0.88)               | NC <sup>c</sup>                |
| Nighttime DBP                                              | 0.86 (0.85 to 0.88)               | 0.0000 (−0.0008 to 0.0009)     | 0.86 (0.85 to 0.88)               | NA                             |
| Diastolic dipping ratio                                    | 0.86 (0.85 to 0.88)               | NC <sup>d</sup>                | 0.86 (0.85 to 0.88)               | NC <sup>c</sup>                |
| <b>Stroke</b> (n = 822)                                    |                                   |                                |                                   |                                |
| Conventional DBP                                           | 0.84 (0.82 to 0.86)               | NC <sup>c</sup>                | 0.85 (0.83 to 0.86)               | 0.0011 (−0.0005 to 0.0028)     |
| Automated office DBP                                       | 0.84 (0.82 to 0.86)               | NC <sup>c</sup>                | 0.85 (0.83 to 0.86)               | NC <sup>c</sup>                |
| 24-hour DBP                                                | 0.84 (0.82 to 0.86)               | NA                             | 0.85 (0.83 to 0.86)               | 0.0016 (−0.0003 to 0.0034)     |
| Daytime DBP                                                | 0.84 (0.82 to 0.86)               | NC <sup>c</sup>                | 0.85 (0.83 to 0.86)               | 0.0012 (−0.0003 to 0.0028)     |
| Nighttime DBP                                              | 0.84 (0.82 to 0.86)               | 0.0005 (−0.0009 to 0.0019)     | 0.85 (0.83 to 0.86)               | NA                             |
| Diastolic dipping ratio                                    | 0.84 (0.82 to 0.86)               | 0.0005 (−0.0008 to 0.0019)     | 0.85 (0.83 to 0.86)               | 0.0013 (−0.0004 to 0.0029)     |

Abbreviations: AUC, area under the receiver operating characteristic curve for the 10-year absolute risk; CI, 95% confidence interval; CV, cardiovascular;  $\Delta$ AUC, change in AUC; DBP, Diastolic blood pressure; NA, not applicable.

<sup>a</sup> Basic models included cohort, sex, age, body mass index, smoking and drinking, serum cholesterol, antihypertensive drug intake, history of cardiovascular disease and diabetes mellitus and 24-hour or nighttime DBP.

<sup>b</sup>  $\Delta$ AUC for adding a DBP index identified by the row label to a basic model already including covariables and 24-hour or nighttime DBP. Models were constructed using the residual method (see Statistical Analysis).

<sup>c</sup> NC indicates that the improvement in model performance was not calculated, because the hazard ratio for the DBP index did not attain significance in multivariable-adjusted models already including either 24-hour or nighttime DBP (eTable 5).

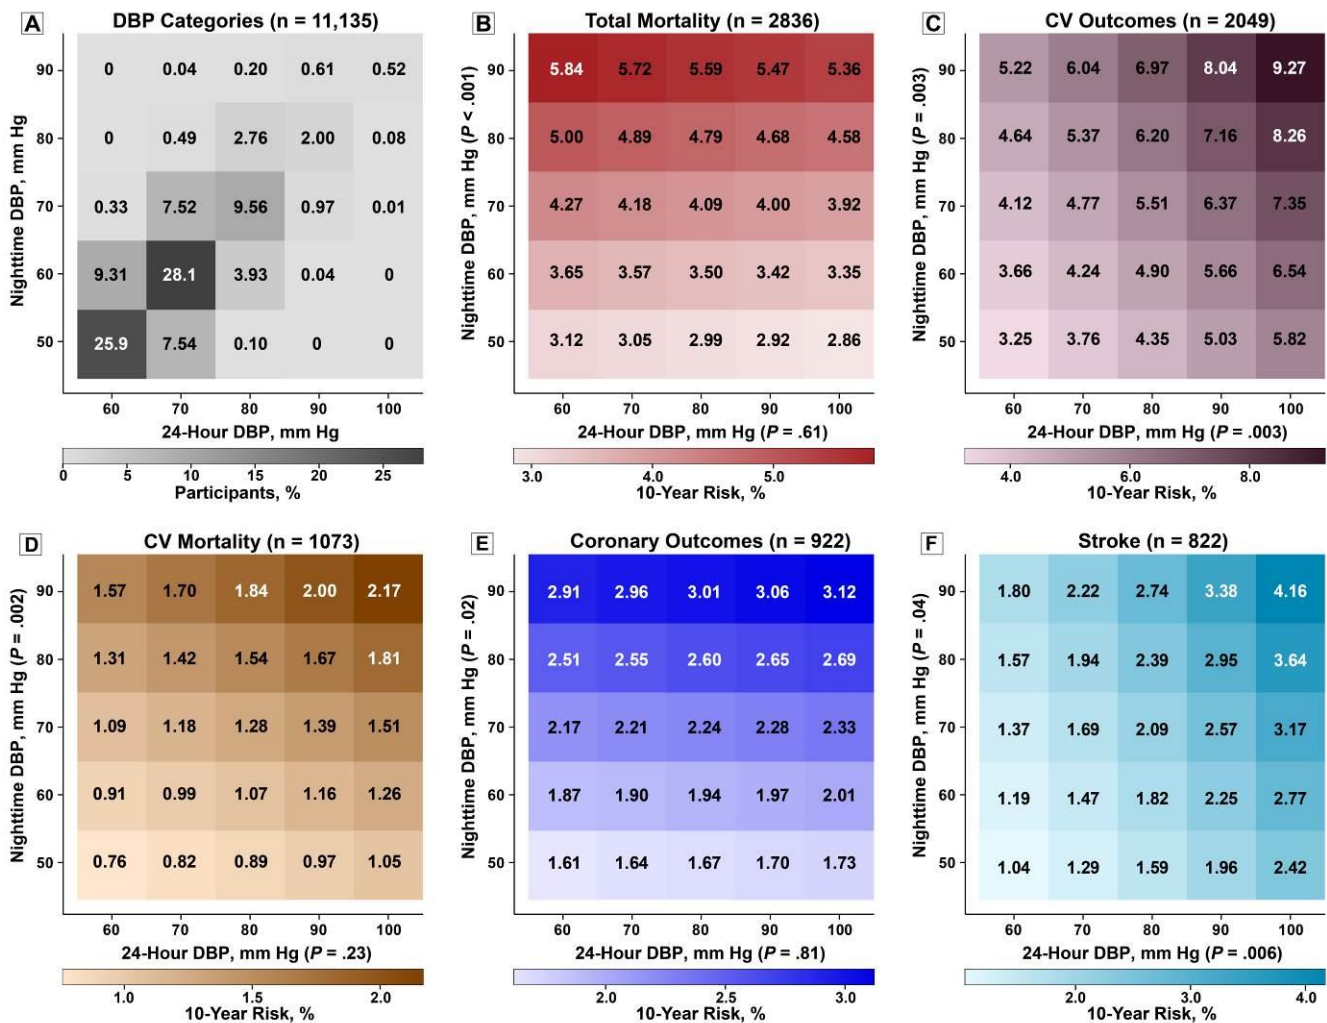

**eFigure 1. Heat Map Depicting 10-Year Risk in Relation to 24-Hour and Nighttime Diastolic Pressure in 11,135 Study Participants**

Heat maps were derived by Cox proportional hazards regression with 24-hour and nighttime diastolic blood pressure (DBP) analyzed as continuous variables. Estimates of 10-year risk were standardized to the average of the distributions in the whole study population (mean or ratio) of cohort identifier, sex, age, body mass index, smoking and drinking, antihypertensive drug treatment, serum cholesterol, history of cardiovascular (CV) disease and diabetes mellitus. Numbers in the grids in Panel A represent the percent of participants within each cross-classification category. Numbers in colored grids (Panels B–F) the 10-year risk of an end point. Along the vertical axis, the risks of all Outcomes (B–F) were significantly greater with higher nighttime DBP ( $P \leq .04$ ), but along the horizontal axis only the risk of the composite CV outcomes (C;  $P = .003$ ) and stroke (F;  $P = .006$ ) were significantly greater with higher 24-hour DBP. Risks of total mortality (B), CV mortality (D) and coronary outcomes (E) were not significantly associated with 24-hour DBP ( $P \geq .23$ ).

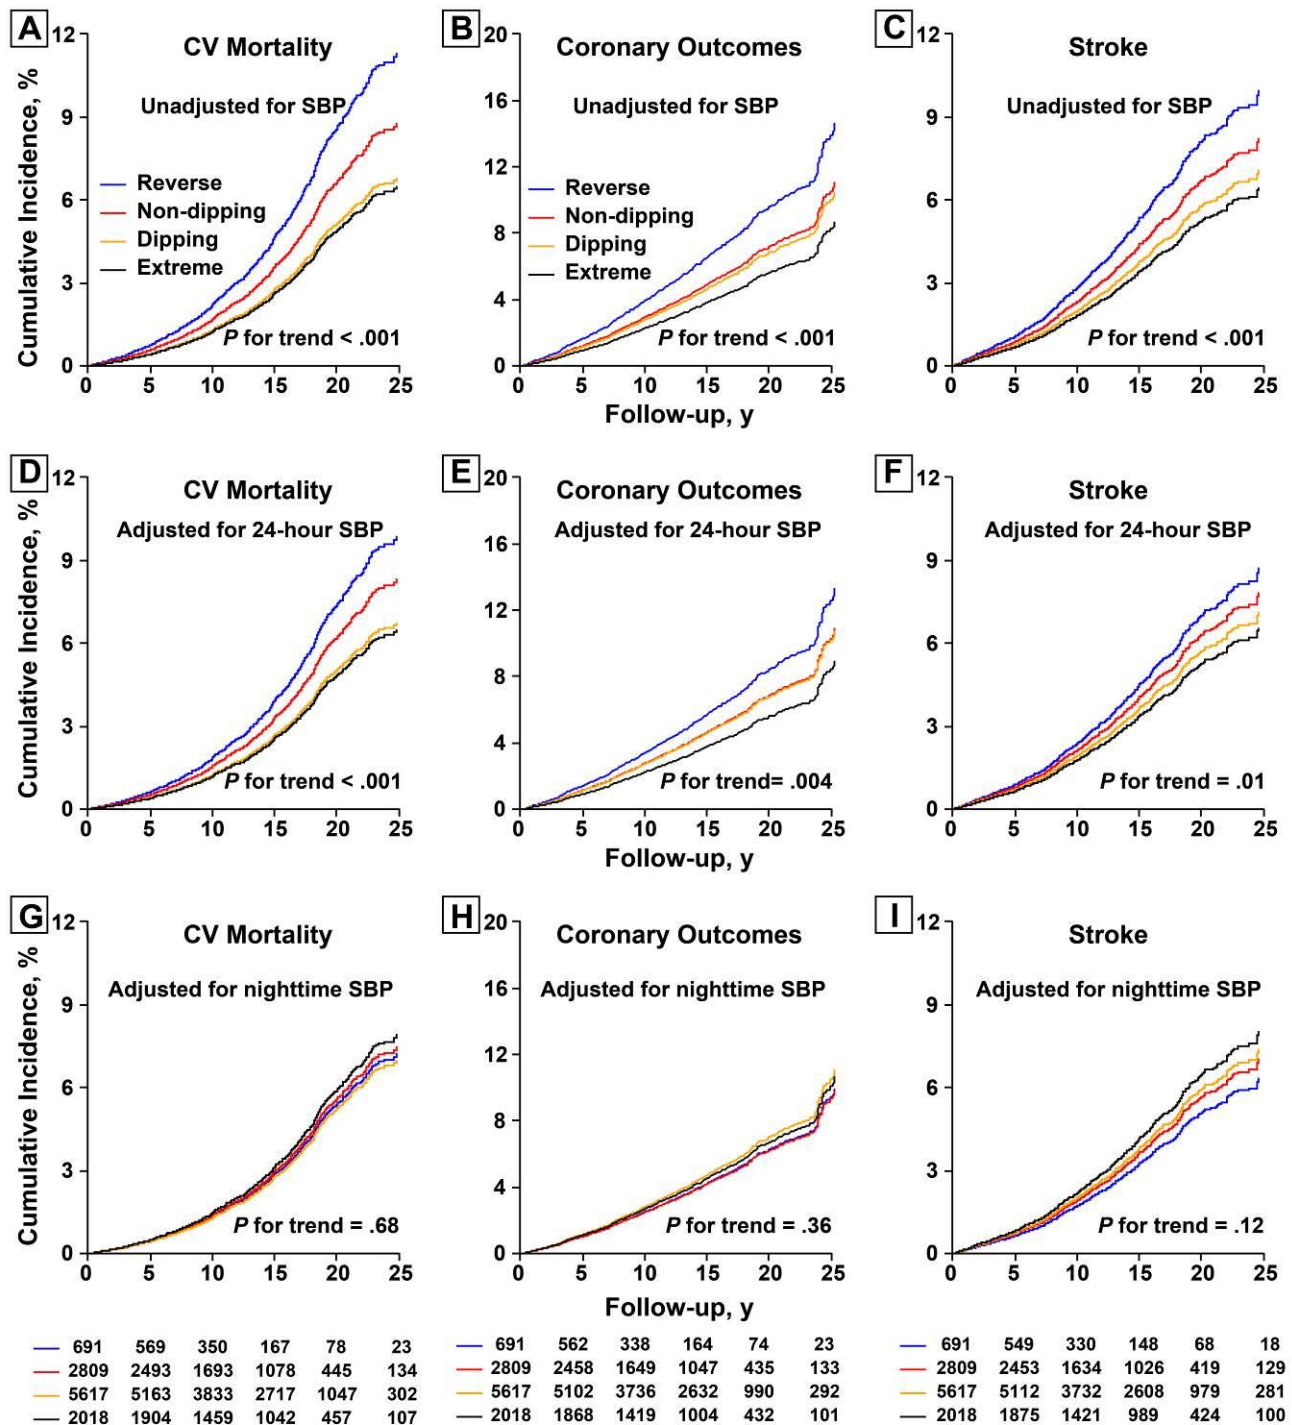

**eFigure 2. Cumulative Incidence of Cardiovascular Mortality, Coronary Outcomes and Stroke by Dipping Status**

Participants were categorized in extreme dippers ( $\leq 0.80$ ), normal dippers ( $> 0.80$  to  $\leq 0.90$ ), non-dippers ( $> 0.90$  to  $\leq 1.00$ ) and reverse dippers ( $> 1.00$ ) based on the systolic dipping ratio. Tabulated data are the number of participants at risk by dipping status at 5-year intervals. *P*-values for trend were derived by Cox proportional hazards regression. All estimates accounted for sex and age (Panels A–I). Additional adjustment for 24-hour SBP (Panels D, E and F) did not remove significance, whereas additional adjustment for nighttime SBP did (Panels G, H and I).
