# Supplementary material
Source: PubMed Central journal article supplement (PMC6822661)
Supplement: jama-322-409-s002.pdf [file jama-322-409-s002.pdf]

**Data Sharing Statement**

All relevant data are within the paper. Informed consent given by study participants did not include data sharing with third parties. Anonymized data can be made available to investigators for targeted non-commercial research based on a motivated request to be submitted to JA Staessen and pending ethical clearance by each of the 13 participating centers.
